# Supplementary material for: Reference intervals of routine clinical chemistry parameters among apparently healthy young adults in Amhara National Regional State, Ethiopia
Source: PLoS One. 2018 Aug 2;13(8):e0201782. doi: 10.1371/journal.pone.0201782 (PMC6072122; doi:10.1371/journal.pone.0201782)
Supplement: S1 File — (XLSX) [file pone.0201782.s001.xlsx]

## Sheet: Sheet1
Code	Sex	Age	Marital status	Occupation	ALT	AST	ALP	Amylase	GGT	Bilirubin (Direct)	Bilirubin (Total)	Total protein	Albumin	Total cholesterol	Triglycerides	Creatinine	Urea	Uric acid
1	Female	18	Single	Student	11	11	230	54	7	0.09	0.2	6.8	4.6	140	157	0.65	13	3.1
2	Female	20	Single	Student	14	14	82	60	7	0.09	0.21	6.3	4.6	136	66	0.71	20	3.3
3	Female	18	Single	Student	13	13	168	69	11	0.02	0.08	6.8	4.6	137	156	0.64	10	3.4
4	Male	30	Married	Employed	27	18	121	104	31	0.09	0.18	7	5	144	84	1.06	28	5.3
5	Male	20	Single	Student	17	38	235	63	19	0.1	0.19	7.5	5.3	129	102	0.81	21	3.8
6	Male	22	Single	Student	26	32	157	106	22	0.19	0.44	7.1	5.1	119	85	0.83	21	4.2
7	Male	21	Single	Student	17	18	171	56	16	0.08	0.18	7.5	5.6	117	154	0.81	25	4.7
8	Male	21	Single	Student	15	22	234	48	10	0.1	0.19	6.9	4.7	140	120	0.71	24	3.8
9	Male	21	Single	Student	13	17	166	73	11	0.17	0.44	6.8	5.1	124	138	0.9	22	5.6
10	Male	21	Single	Student	17	25	129	32	12	0.16	0.22	6.3	4	107	65	0.81	31	3.9
11	Male	19	Single	Student	27	21	362	71	10	0.09	0.13	7.3	5.2	147	171	0.77	16	4
12	Male	18	Single	Student	5	4	41	10	13	0.02	0.02	7.2	5.5	112	112	0.16	29	1.8
13	Male	21	Single	Student	20	23	143	54	31	0.08	0.24	7.4	4.4	103	92	0.75	27	3.5
14	Male	20	Single	Student	14	16	151	146	19	0.02	0.38	8.2	4.9	130	123	0.84	19	3.7
15	Male	23	Single	Employed	12	15	311	95	25	0.12	0.32	7.5	5.2	133	207	0.93	26	6.5
16	Female	19	Single	Student	27	20	204	40	11	0.13	0.27	7.1	5	127	122	0.67	16	3.3
17	Female	20	Single	Student	17	13	161	114	9	0.1	0.18	7	4.9	160	78	0.64	20	3
18	Female	19	Single	Student	17	18	170	48	13	0.04	0.14	6.8	4.7	160	56	0.18	17	2.5
19	Female	18	Single	Student	13	16	169	72	14	0.06	0.14	7.1	4.5	144	73	0.68	20	4.5
20	Female	19	Single	Student	9	13	142	48	8	0.06	0.13	7.2	5	125	125	0.75	18	3.2
21	Male	19	Single	Student	27	23	343	82	18	0	0.08	7.6	4.7	115	103	0.83	15	4.9
22	Male	18	Single	Student	14	23	226	137	14	0.05	0.14	6.9	4.9	116	146	0.81	18	4.3
23	Male	19	Single	Student	32	23	163	45	23	0.06	0.2	7.8	5.3	208	139	0.9	23	4.4
24	Male	19	Single	Student	15	18	181	82	9	0.12	0.29	7.8	5.4	160	132	0.97	20	5.2
25	Male	20	Single	Student	26	25	170	108	14	0.01	0.1	6.7	4.6	169	131	0.96	25	5.3
26	Female	18	Single	Student	13	19	154	65	15	0.02	0.13	7.1	5	117	88	0.87	17	3.7
27	Female	19	Single	Student	11	16	129	61	11	0.21	0.52	6.7	4.8	119	49	0.78	17	3.7
28	Female	19	Single	Student	24	18	159	46	16	0.15	0.32	7.4	5	162	127	0.68	21	4.8
29	Female	18	Single	Student	9	17	256	45	8	0.09	0.12	7.3	4.8	133	149	0.76	14	3.6
30	Female	19	Single	Student	9	14	177	57	6	0.01	0.09	7.1	4.8	124	80	0.75	19	4.4
31	Female	19	Single	Student	24	21	211	104	8	0.09	0.27	6.2	4.9	128	116	0.77	24	3.3
32	Female	19	Single	Student	16	17	202	85	53	0	0.05	7	4.9	222	115	0.97	22	4.9
33	Male	20	Single	Student	12	19	192	68	8	0.13	0.31	7	5.2	132	84	1.02	25	5.6
34	Female	18	Single	Student	13	12	188	62	8	0.09	1.31	6.4	4.5	169	64	0.81	31	2.4
35	Male	22	Single	Student	9	15	136	94	12	0.19	0.91	7	4.7	121	89	0.9	24	3.8
36	Male	19	Single	Student	15	14	267	29	12	0.2	0.31	7.6	5.3	126	105	0.84	16	4.1
37	Male	20	Single	Student	12	18	240	40	14	0.26	0.42	7.4	5.6	101	90	0.99	27	4.9
38	Male	22	Single	Student	18	19	198	74	15	0.29	0.48	7.6	5.7	184	82	0.81	21	4
39	Male	20	Single	Student	17	23	405	72	8	0.15	0.43	6.8	4.5	132	72	0.68	28	5.5
40	Female	21	Single	Student	14	15	158	85	15	0.16	0.28	7.5	5.4	160	87	0.76	18	3.8
41	Male	21	Single	Employed	10	16	286	70	11	0.85	1.1	7.4	5.2	105	109	0.85	29	5.3
42	Male	23	Single	Employed	12	16	448	65	30	0.18	0.39	7.1	5.1	127	46	0.74	20	2.9
43	Male	24	Single	Employed	14	17	247	108	18	0.12	0.26	7.3	5.1	113	156	0.84	21	3.9
44	Male	25	Single	Employed	6	14	204	45	17	0.12	0.34	6.8	4.5	111	63	0.91	16	4.9
45	Male	30	Married	Employed	60	24	216	37	70	0.13	0.36	8	5.5	202	161	0.96	21	6.5
46	Male	27	Single	Employed	17	16	198	61	19	0.11	0.32	7.5	5.4	141	86	0.86	40	5.3
47	Male	25	Single	Employed	14	20	123	43	10	0.01	1.16	6.9	5.3	133	89	0.7	24	3.9
48	Male	23	Single	Employed	19	13	222	71	17	0.18	0.44	8.1	5.6	189	149	0.87	30	4.8
49	Female	26	Single	Employed	16	14	105	93	11	0.15	0.3	6.9	5.3	124	45	0.7	20	2.9
50	Female	25	Single	Employed	59	32	157	59	28	0.06	0.12	7.4	4.5	187	242	0.71	22	4.1
51	Male	23	Single	Employed	21	18	185	65	32	0.37	0.73	7.7	5.3	134	91	0.78	21	5
52	Male	27	Single	Employed	12	13	269	67	17	0.29	0.47	7.3	5	133	136	0.91	25	5.2
53	Male	23	Single	Employed	13	12	274	58	15	0.23	0.47	6.9	5.3	109	36	0.9	26	5
54	Male	22	Single	Employed	16	19	104	35	12	0.07	0.19	6.8	5.3	153	96	0.86	18	5.2
55	Male	27	Single	Employed	13	16	115	39	8	0.09	0.16	6.6	4.7	168	113	0.73	14	3
56	Female	22	Single	Student	36	28	173	108	28	0.32	0.59	7.6	5.2	182	171	1.07	25	6.2
57	Male	26	Single	Employed	9	14	169	26	14	0.08	0.15	6.7	4.9	172	79	0.65	17	2.9
58	Male	27	Single	Employed	13	11	141	49	15	0.12	0.24	7.9	4.9	153	205	0.86	18	5.4
59	Male	25	Single	Employed	13	14	10	67	16	0.42	0.8	7.6	5.5	151	136	0.92	35	5.1
60	Male	28	Single	Student	13	12	466	60	15	0.4	0.45	7.2	5.6	139	82	0.85	16	4.1
61	Female	26	Single	Student	10	16	91	51	11	0.06	0.12	7.4	4.8	165	150	0.59	19	3.8
62	Male	19	Single	Student	12	14	293	80	13	0.1	0.36	8.4	5.2	162	100	1.01	31	6.4
63	Female	19	Single	Student	16	17	236	66	14	0.01	0.07	6.8	4.6	149	99	0.82	18	4.6
64	Female	19	Single	Student	21	23	210	70	15	0.06	0.12	6.9	5.1	115	47	0.67	19	2.5
65	Male	18	Single	Student	29	43	177	85	9	0.07	0.2	7.1	5	131	106	0.67	28	4.9
66	Male	20	Single	Student	18	21	211	39	12	0.05	0.13	7.2	5.5	101	119	0.86	23	3.4
67	Male	20	Single	Student	18	15	180	27	7	0.07	0.11	7.6	5.1	150	104	0.67	23	3
68	Female	19	Single	Student	10	16	116	50	9	0.09	0.21	7	5.2	175	87	0.69	17	3.1
69	Male	20	Single	Student	18	19	208	34	11	0.07	0.22	7	5.3	131	59	0.86	30	3.7
70	Male	18	Single	Student	12	17	279	78	58	0.07	0.21	7	5.1	139	132	0.86	12	5.1
71	Female	18	Single	Student	12	11	136	49	8	0	0.07	6.5	4.6	132	87	0.54	26	3.3
72	Male	18	Single	Student	11	13	247	37	11	0.02	0.11	6	4.5	108	67	0.76	16	5.4
73	Male	18	Single	Student	23	15	379	55	68	0.07	0.17	7.7	4.9	111	68	0.72	22	2.4
74	Male	18	Single	Student	18	19	163	41	16	0.11	0.32	7.3	5.1	117	75	0.8	31	6
75	Male	26	Single	Employed	34	21	227	92	46	0.08	0.09	7.9	4.5	187	54	0.8	30	6.2
76	Female	18	Single	Student	13	13	261	60	13	0.08	0.15	6.7	5	141	58	0.63	21	2.7
77	Female	18	Single	Student	11	12	94	37	8	0.05	0.13	6.3	4.5	162	79	0.65	19	3.7
78	Male	20	Single	Student	19	14	156	68	14	0.13	0.27	6.6	4.6	120	134	0.65	25	2.8
79	Female	18	Single	Student	10	10	95	25	10	0.11	0.2	6.9	5	101	49	0.63	14	3.1
80	Male	19	Single	Student	14	12	173	36	10	0.32	0.61	7.4	4.6	71	55	0.8	15	3.6
81	Female	18	Single	Student	11	16	367	85	13	0.12	0.34	7.5	6	114	57	0.72	29	3.5
82	Female	18	Single	Student	6	11	138	49	6	0.09	0.14	6	4.5	107	82	0.59	8	2.3
83	Female	18	Single	Student	18	18	210	56	7	0.08	0.1	8.1	4.9	141	144	0.67	17	2.1
84	Male	18	Single	Student	21	24	205	139	26	0.18	0.33	7.9	5.4	122	40	0.88	16	4.2
85	Male	20	Single	Student	11	14	131	202	10	0.11	0.21	6.6	4.7	122	129	1.04	19	3.6
86	Male	20	Single	Student	16	18	263	139	15	0.19	0.37	7.3	5.3	137	123	0.91	24	3.4
87	Male	18	Single	Student	13	17	415	81	27	0.11	0.25	7.9	5.1	175	107	0.82	24	3.9
88	Male	18	Single	Student	16	27	417	167	13	0.04	0.05	7.1	4.6	103	85	0.78	15	2.7
89	Male	18	Single	Student	17	19	385	53	14	0.07	0.16	6.7	5.6	111	58	0.85	17	3.5
90	Female	18	Single	Student	17	12	222	108	5	0.09	1.17	7.1	4.8	111	92	0.75	33	3.2
91	Male	20	Single	Student	14	16	102	101	10	0.18	0.27	7.9	5.7	164	79	1.02	52	3.5
92	Female	18	Single	Student	8	11	132	69	18	0.1	0.31	6.7	5.1	120	50	0.87	22	2.9
93	Male	20	Single	Student	19	26	219	57	48	0.07	0.29	8.2	5	181	200	1.12	27	5.3
94	Female	18	Single	Student	14	15	190	74	10	0.07	0.15	7.2	4.9	99	88	0.64	18	2.5
95	Male	24	Single	Student	18	13	169	56	36	0.16	0.34	7.9	5	109	131	0.83	29	3.3
96	Male	19	Single	Student	14	21	477	65	11	0.03	0.21	6.9	5.1	84	63	0.73	22	3.9
97	Male	18	Single	Student	20	26	483	88	12	0.08	0.19	7.3	4.9	114	80	0.79	34	4
98	Male	18	Single	Student	12	14	491	53	10	0.04	0.16	7.1	4.8	109	66	0.87	24	3.1
99	Female	18	Single	Student	19	23	195	111	14	0	0.08	7.5	5.2	162	133	0.81	8	3.9
100	Male	18	Single	Student	26	25	271	39	18	0.2	0.39	8.6	5.5	117	104	0.9	19	5.2
101	Male	28	Married	Employed	31	23	197	73	27	0.09	0.22	7.3	4.9	192	154	1.15	37	7.3
102	Male	25	Single	Employed	15	16	174	97	19	0.07	0.18	7.1	5.3	197	176	0.96	53	5.8
103	Male	30	Married	Employed	26	20	257	43	56	0.09	0.31	7.3	4.6	186	181	0.91	27	5.8
104	Male	28	Single	Employed	49	30	330	118	48	0.19	0.35	7.3	4.3	159	104	0.79	35	4.4
105	Female	24	Single	Employed	7	13	114	46	13	0.01	0.17	7	4.7	149	78	0.73	18	4.9
106	Female	19	Single	Student	15	13	212	75	12	0.22	0.43	7.3	5.2	168	53	0.69	29	3.2
107	Male	24	Single	Student	9	14	193	50	19	0.32	0.64	6.9	4.7	121	105	0.88	20	4.6
108	Male	28	Single	Student	10	9	220	67	29	0.13	0.25	7.4	4.4	128	111	0.83	25	4.5
109	Male	25	Single	Student	21	21	174	108	25	0.38	0.63	7.6	5.4	113	130	0.85	20	4.2
110	Male	25	Single	Student	15	18	174	75	17	0.19	0.38	6.6	5.1	122	81	0.86	18	4.8
111	Male	25	Single	Student	11	10	207	73	11	0.2	0.4	6.9	5.1	139	162	0.79	19	4.4
112	Male	28	Single	Student	15	13	295	51	10	0.09	0.21	7.7	4.6	147	244	0.86	21	5.3
113	Male	19	Single	Student	17	22	199	75	14	0.14	0.24	7.4	5.1	100	84	0.84	32	4.2
114	Male	20	Single	Student	48	29	162	177	15	0.27	0.47	7.5	5.5	129	88	0.89	28	4.1
115	Male	20	Single	Student	15	10	206	61	16	0.28	0.45	7.4	4.8	103	78	0.73	25	5.2
116	Female	18	Single	Student	17	16	195	69	11	0.18	0.26	6.6	4.7	101	45	0.69	12	2.6
117	Female	18	Single	Student	18	15	199	103	24	0.11	0.19	6.8	4.8	86	139	0.65	30	3.3
118	Male	19	Single	Student	18	17	173	11	10	0.17	0.32	7.1	5	107	69	0.78	16	3.3
119	Female	18	Single	Student	20	22	147	87	7	0.11	0.23	6.8	4.7	141	104	0.62	15	2.2
120	Female	18	Single	Student	25	17	241	49	9	0.12	0.2	6.8	4.7	129	98	0.63	17	4.1
121	Female	19	Single	Student	20	18	111	83	11	0.16	0.28	7.1	4	94	121	0.51	15	2.3
122	Male	18	Single	Student	24	19	112	87	12	0.18	0.38	7.7	6	117	121	0.67	22	4.2
123	Male	21	Single	Student	22	19	159	57	13	0.29	0.63	7.3	4.9	121	131	0.62	17	3.2
124	Male	21	Single	Student	14	15	174	73	32	0.43	0.88	7.4	5.3	136	139	0.65	25	3.6
125	Female	18	Single	Student	13	15	107	39	10	0.23	0.43	7.1	5.1	149	97	0.62	14	2.2
126	Female	18	Single	Student	18	15	161	15	9	0.11	0.21	7.5	5.5	153	72	0.66	16	3.6
127	Male	22	Single	Student	56	40	106	71	20	0.34	0.85	7.8	5.2	140	106	0.75	11	4.5
128	Female	18	Single	Student	17	16	171	40	12	0.19	0.33	7.2	5	162	161	0.62	12	2.9
129	Female	18	Single	Student	21	22	125	10	11	0.09	0.21	7.7	4.9	132	115	0.65	24	3.2
130	Female	18	Single	Student	20	13	214	34	10	0.21	0.36	7.1	5	113	86	0.57	27	2.1
131	Female	20	Single	Student	17	19	158	25	15	0.33	0.51	7.5	5.9	107	93	0.67	25	2.3
132	Male	20	Single	Student	25	26	149	17	8	0.18	0.38	7.3	5.6	82	126	0.66	17	3.8
133	Male	18	Single	Student	23	23	334	84	4	0.14	0.29	7.1	5.2	117	166	0.68	15	4.3
134	Male	19	Single	Student	20	23	205	45	10	0.26	0.49	7.9	5.6	108	119	0.71	14	3.8
135	Male	19	Single	Student	13	19	208	33	10	0.35	0.64	7.1	5.8	103	129	0.65	9	2.9
136	Female	18	Single	Student	18	22	105	37	8	0.18	0.37	6.9	5.7	192	116	0.58	12	3.3
137	Male	20	Single	Student	16	17	201	32	13	0.47	0.8	6.8	5.2	98	43	0.76	19	4.1
138	Male	19	Single	Student	22	20	285	25	10	0.11	0.2	7.6	5.7	103	75	0.72	11	4.5
139	Female	19	Single	Student	10	12	156	89	12	0.04	0.13	6.8	4.8	95	53	0.82	15	3.3
140	Female	20	Single	Student	16	14	181	67	22	0.06	0.1	7.7	4.8	141	91	0.85	12	3.7
141	Female	20	Single	Student	12	10	95	72	9	0.03	0.1	6.8	4.6	179	89	0.73	21	3.5
142	Female	19	Single	Student	9	11	114	56	12	0.03	0.11	7	4.5	141	122	0.82	13	2.4
143	Female	20	Single	Student	9	11	190	33	9	0.08	0.17	7.4	5.2	186	135	0.77	21	3.7
144	Female	20	Single	Student	9	11	202	122	11	0.06	0.1	7.9	4.5	154	80	1.13	27	4.4
145	Female	19	Single	Student	7	8	144	92	10	0.07	0.11	7.3	5.1	185	116	0.75	19	2.8
146	Male	25	Single	Student	18	12	127	48	7	0.15	0.32	7.3	5.6	135	106	0.79	22	5.7
147	Male	23	Single	Student	18	14	143	20	12	0.26	0.52	7	5.3	135	151	0.56	10	5.7
148	Female	22	Single	Student	8	11	148	73	9	0.09	0.18	6.6	4.3	104	138	0.72	15	3.3
149	Male	20	Single	Student	22	10	142	78	14	0.06	0.09	7.1	5	131	56	0.95	24	4.4
150	Male	30	Single	Student	29	15	205	70	36	0.09	0.19	7.3	4.6	137	150	1.04	24	6
151	Male	24	Single	Student	16	17	205	78	19	0.52	1.1	7.3	5.5	113	178	0.91	32	4.1
152	Female	20	Single	Student	11	15	166	36	15	0	0.07	7	4.8	169	115	0.96	20	3.5
153	Female	20	Single	Student	9	13	119	94	11	0.01	0.1	6.9	4.7	119	69	0.93	18	3.4
154	Female	20	Single	Student	10	11	148	56	67	0.12	0.24	6.7	4.6	146	108	0.94	22	4.5
155	Male	25	Single	Student	44	22	147	77	22	0.09	0.21	7	5.2	198	174	1.02	17	5.9
156	Male	20	Single	Student	13	13	136	64	14	0.47	0.46	6.7	5	94	53	0.98	30	3.3
157	Female	22	Single	Student	9	10	177	37	16	0.05	0.15	6.7	4.3	161	102	0.74	12	3.3
158	Male	21	Single	Student	24	17	122	68	13	0.17	0.34	7.7	5	137	134	0.83	16	4.9
159	Female	19	Single	Student	14	14	165	67	18	0.06	0.1	6.8	4.6	111	134	0.63	18	3
160	Female	19	Single	Student	10	12	183	85	18	0.08	0.15	7.5	4.5	119	98	0.68	11	3
161	Male	20	Single	Student	16	17	298	118	21	0.17	0.37	7.7	5.5	130	79	0.97	20	4.8
162	Male	18	Single	Student	17	15	147	82	15	0.16	0.31	7.2	5.2	116	137	0.88	29	4.1
163	Female	21	Single	Student	8	15	125	120	7	0.11	0.18	7.3	4.7	105	71	0.68	21	3.6
164	Female	20	Single	Student	7	11	169	58	18	0.29	0.48	6.7	4.9	168	74	0.69	19	4.1
165	Male	20	Single	Student	21	16	180	100	20	0.14	0.31	8	5.4	149	148	0.97	21	4.7
166	Female	19	Single	Student	23	19	294	98	24	0.1	0.18	7.3	4.8	132	76	0.69	20	3.4
167	Male	20	Single	Student	11	14	183	147	25	0.18	0.35	7.1	5.1	119	65	0.95	25	4.7
168	Female	19	Single	Student	10	14	129	90	14	0.1	0.18	7	4.8	115	81	0.75	16	4.3
169	Female	20	Single	Student	22	21	143	48	12	0.15	0.26	6.7	4.6	152	91	0.67	25	2.6
170	Female	21	Single	Student	13	13	116	61	6	0.13	0.2	6.8	4.4	170	56	0.77	31	4.3
171	Male	21	Single	Student	17	16	227	96	17	0.54	1.19	7.4	4.9	93	64	0.8	24	2.4
172	Female	18	Single	Student	11	13	132	62	11	0.26	0.36	6.6	5.1	135	56	0.7	24	4.7
173	Female	19	Single	Student	12	14	498	99	14	0.15	0.26	7.1	4.8	143	211	0.79	30	4.6
174	Female	20	Single	Student	7	9	131	47	8	0.18	0.34	7.2	5.1	145	72	0.82	41	3.2
175	Female	20	Single	Student	10	12	133	81	11	0.09	0.2	7	4.8	168	113	0.75	10	3.2
176	Female	20	Single	Student	8	9	156	83	10	0.08	0.15	6.7	4.5	90	44	0.73	25	2.7
177	Female	20	Single	Student	9	12	122	104	11	0.14	0.3	6.7	5.2	78	53	0.71	11	3.6
178	Female	20	Single	Student	13	18	165	66	9	0.12	0.21	7.7	5.5	154	133	0.79	32	4.5
179	Female	21	Single	Student	13	16	129	52	10	0.11	0.2	7.1	4.8	114	86	0.76	14	2.9
180	Female	20	Single	Student	30	16	93	98	13	0.37	0.79	6.7	4.6	116	114	0.9	26	4.7
181	Male	28	Single	Student	12	15	129	114	17	0.2	0.35	7	4.6	141	195	0.9	20	5.3
182	Male	26	Single	Student	49	36	271	139	29	0.26	0.52	7.1	5.3	159	89	1.02	23	4.4
183	Male	18	Single	Student	14	17	204	55	15	0.17	0.27	7.6	4.9	159	84	1	16	4.4
184	Male	18	Single	Student	19	23	248	59	9	0.15	0.29	7.1	4.7	101	74	0.86	17	4.1
185	Male	18	Single	Student	16	22	279	97	14	0.21	0.37	7.7	5.6	93	90	0.8	20	3.6
186	Male	19	Single	Student	20	28	349	104	12	0.56	1.27	8.1	5.3	123	100	1.08	26	2.8
187	Male	18	Single	Student	24	19	341	50	15	0.28	0.45	7	4.8	104	62	0.91	18	3
188	Male	18	Single	Student	14	21	379	35	11	0.21	0.32	7.3	4.9	147	90	0.8	18	4
189	Male	18	Single	Student	17	19	294	72	13	0.21	0.4	7.1	5.1	133	76	0.78	23	3.2
190	Female	18	Single	Student	9	12	197	44	11	0.1	0.18	6.5	4.9	122	98	0.8	18	4.3
191	Female	18	Single	Student	14	20	103	15	10	0	0.05	6.8	5	178	121	0.65	13	2.9
192	Female	18	Single	Student	10	13	135	35	15	0.18	0.35	7.1	5.5	156	124	0.69	28	3.5
193	Female	18	Single	Student	26	27	240	110	14	0.14	0.25	7.4	4.9	210	198	0.72	28	3.8
194	Female	18	Single	Student	13	17	212	89	15	0.11	0.21	7.4	4.7	179	151	0.67	19	3.5
195	Male	18	Single	Student	18	19	196	28	11	0.33	0.51	7.5	5.3	123	94	0.78	17	4.1
196	Male	18	Single	Student	15	21	130	85	12	0.72	1.64	7.1	5.2	118	155	0.86	22	4.3
197	Female	18	Single	Student	16	13	162	37	8	0.26	0.19	6.5	4.6	125	101	0.75	14	5
198	Female	18	Single	Student	15	24	170	36	9	0.21	0.38	7.4	5	116	61	0.69	20	3
199	Female	18	Single	Student	21	21	132	33	12	0.21	0.34	7	4.7	189	139	0.7	22	3.6
200	Female	18	Single	Student	19	21	138	131	9	0.16	0.25	6.8	4.8	147	94	0.67	31	1.9
201	Male	18	Single	Student	16	18	395	35	13	0.16	0.28	7.3	5.1	103	77	0.81	27	4.2
202	Female	18	Single	Student	46	27	134	62	12	0.12	0.35	7.1	5.2	172	180	0.72	12	3.3
203	Female	18	Single	Student	11	14	123	59	7	0.21	0.37	6.7	4.4	94	88	0.67	15	2.9
204	Female	18	Single	Student	19	18	132	23	11	0.2	1.31	7.3	5.2	162	204	0.66	19	2.6
205	Female	18	Single	Student	14	16	127	42	9	0.37	0.62	7.7	5	148	91	0.65	29	2.7
206	Male	19	Single	Student	17	15	151	100	25	0.27	0.46	7.6	5.2	129	126	0.77	14	3.8
207	Female	18	Single	Student	16	16	158	77	11	0.32	0.59	7.8	5	145	84	0.69	14	1.7
208	Female	18	Single	Student	27	27	189	65	15	0.05	0.34	8.1	5.6	117	156	0.74	11	3.1
209	Male	18	Single	Student	19	19	132	93	17	0.27	0.45	7.3	5.1	118	93	0.7	15	4
210	Female	18	Single	Student	13	16	145	24	19	0.19	0.34	7.2	5	140	97	0.65	12	4.1
211	Male	18	Single	Student	24	19	147	79	17	0.68	1.38	7.9	5.4	109	54	0.8	29	3.5
212	Male	18	Single	Student	20	14	228	97	9	0.5	0.79	8.5	6	135	171	0.74	31	3.6
213	Male	18	Single	Student	26	25	311	47	19	0.29	0.53	6.6	5	89	71	0.8	20	5.3
214	Male	22	Single	Student	17	19	198	73	13	0.17	0.36	6.7	4.8	98	73	0.84	13	3.6
215	Male	20	Single	Student	18	20	153	34	13	0.12	0.25	7.3	5.8	119	103	0.66	21	4.9
216	Male	25	Single	Student	22	15	168	53	14	0.21	0.27	7.3	4.7	120	187	0.86	19	4.1
217	Male	23	Single	Student	18	16	144	74	23	0.41	1.89	7.1	5.2	123	55	0.9	33	5.5
218	Female	19	Single	Student	7	10	151	47	6	0.11	0.21	7	4.9	123	70	0.77	21	3.7
219	Female	23	Single	Student	15	14	148	66	11	0.05	0.14	7.1	4.5	154	149	0.74	17	3.2
220	Male	19	Single	Student	9	16	144	65	5	0.16	0.34	7.3	5.4	112	59	0.62	20	5.5
221	Male	18	Single	Student	16	21	312	98	13	0.07	0.16	6.8	5.3	91	102	0.72	20	4.7
222	Male	22	Single	Student	19	16	184	14	11	0.1	0.22	7.7	5.9	142	104	0.67	19	3.6
223	Female	18	Single	Student	14	18	161	20	8	0.13	0.28	7.5	5.7	139	66	0.6	12	4.8
224	Female	18	Single	Student	13	11	112	29	10	0	0.11	6.5	5.4	144	91	0.64	20	3.4
225	Female	18	Single	Student	13	13	129	49	8	0.03	0.14	6.5	5.1	194	127	0.54	18	3.1
226	Female	18	Single	Student	19	13	156	54	7	0.08	0.14	7.3	5.5	101	97	0.62	18	3.4
227	Female	18	Single	Student	12	14	131	14	10	0.04	0.14	6.6	5.2	116	85	0.7	16	3.5
228	Female	18	Single	Student	20	18	182	30	9	0.06	0.13	7.3	5.4	127	66	0.6	8	2.1
229	Female	18	Single	Student	15	10	186	59	9	0.15	0.28	6.5	4.6	183	106	0.83	26	3.7
230	Female	18	Single	Student	20	23	182	93	10	0.12	0.27	7.1	5.1	174	93	0.74	18	3.4
231	Male	19	Single	Student	14	28	16	94	10	0.03	0.06	7.9	5.7	154	95	0.79	20	4.5
232	Male	20	Single	Student	11	12	365	45	12	0.12	0.14	8	5.1	106	85	0.84	19	3.8
233	Female	18	Single	Student	18	21	169	77	9	0.21	0.38	7.2	5.1	167	165	0.68	17	3.5
234	Male	18	Single	Student	15	23	300	95	15	0.15	0.2	7.6	5	153	189	0.74	29	4.3
235	Male	18	Single	Student	13	16	155	102	9	0.17	0.37	7	5.3	115	165	0.74	26	4
236	Male	19	Single	Student	10	12	206	122	8	0.2	0.39	6.6	4.8	104	147	0.82	32	3.8
237	Female	18	Single	Student	32	21	143	104	13	0.08	0.19	7.2	4.8	203	198	0.79	17	4
238	Male	18	Single	Student	32	19	275	53	11	0.28	0.53	6.4	5	137	96	0.78	29	5.9
239	Female	18	Single	Student	27	19	237	54	14	0.07	0.16	6.7	4.9	111	67	0.66	12	3.3
240	Male	19	Single	Student	12	15	268	155	10	0.18	0.32	6.9	5.1	107	103	0.8	12	4.8
241	Male	19	Single	Student	13	20	180	73	12	0.15	0.29	6.9	5.2	108	73	0.77	14	4.2
242	Male	18	Single	Student	10	18	445	72	11	0.15	0.36	7.6	5.4	139	115	0.82	22	4.9
243	Male	18	Single	Student	15	18	259	52	12	0.26	0.48	7	5.3	112	94	0.82	25	3.8
244	Male	18	Single	Student	17	22	181	46	15	0.42	0.78	7.2	5.7	135	88	0.84	33	4.8
245	Male	19	Single	Student	12	25	192	98	10	0.09	0.28	7.2	4.8	112	85	0.88	25	4.3
246	Female	20	Single	Student	17	19	376	72	14	0.19	0.39	7.5	5.3	144	248	0.85	16	4
247	Male	27	Single	Employed	22	30	199	78	25	0.3	0.46	7.2	5.1	152	87	0.87	20	6.1
248	Female	22	Single	Student	13	24	148	53	13	0.2	0.31	7.1	4.9	143	58	0.76	14	4.4
249	Male	23	Single	Student	36	40	168	71	32	0.21	0.31	6.4	4.4	140	115	0.84	19	4.6
250	Male	29	Single	Student	10	15	134	99	13	0.3	0.6	7.1	4.9	226	188	0.77	20	5.9
251	Male	24	Single	Employed	14	22	169	62	21	0.52	0.85	6.7	5.2	148	47	0.88	24	4.9
252	Male	27	Single	Employed	12	17	150	74	15	0.36	0.57	6.8	5.2	146	134	0.93	19	6.4
253	Male	21	Single	Student	13	24	160	89	13	0.39	0.64	7.1	5.2	129	89	0.93	16	6.6
254	Male	24	Single	Student	22	22	193	118	21	0.19	0.29	7.4	5.2	182	80	0.84	21	4.6
255	Male	22	Single	Student	14	20	167	146	14	0.22	0.34	7.3	5.2	161	74	0.83	27	5.2
256	Male	25	Single	Employed	56	30	136	71	93	0.44	0.76	7	5	213	219	1.03	33	6.5
257	Male	23	Single	Private worker	29	23	115	100	17	0.15	0.23	6.9	5.1	204	126	0.82	33	4.5
258	Male	24	Single	Private worker	22	23	163	105	19	0.6	1.19	7.4	5.4	151	62	0.88	20	4.1
259	Male	20	Single	Employed	14	40	210	113	11	0.22	0.34	7.4	5	137	61	0.83	27	5
260	Male	23	Single	Student	24	36	125	133	24	0.25	0.36	6.4	4.4	138	104	0.23	23	3.9
261	Male	28	Married	Employed	7	16	162	96	83	0.23	0.27	7.4	4.5	130	98	0.89	25	5.8
262	Male	20	Single	Student	16	16	261	104	9	0.11	0.11	7.9	5	146	56	0.71	28	5.3
263	Female	21	Single	Student	8	12	137	54	12	0.18	0.27	6.7	5.1	96	53	0.67	27	3.4
264	Female	22	Single	Student	7	13	121	68	13	0.06	0.11	6.9	4.8	125	56	0.7	13	3.5
265	Male	22	Single	Student	11	15	100	138	11	0.25	0.33	7.3	5.3	121	126	0.88	17	4.2
266	Male	36	Single	Student	14	13	115	36	50	0.23	0.33	6.9	5.1	138	232	0.74	19	7.1
267	Male	20	Single	Student	13	15	130	82	7	0.22	0.38	7	5.2	127	114	0.77	12	4.7
268	Female	19	Single	Student	7	15	140	98	16	0.2	0.3	6.5	5	118	61	0.68	11	3.5
269	Female	19	Single	Student	7	9	115	82	7	0.07	0.14	6.3	4.8	145	98	0.64	14	2.5
270	Female	18	Single	Student	19	16	329	103	7	0.13	0.15	7.1	4.7	148	145	0.63	19	2.1
271	Female	18	Single	Student	17	14	154	101	9	0.1	0.18	7.2	5.4	140	108	0.65	20	3
272	Female	18	Single	Student	16	15	139	60	11	0.1	0.19	6.9	5.2	130	77	0.63	20	3.1
273	Female	18	Single	Student	10	12	175	93	6	0.24	0.43	7	5.1	108	104	0.48	23	3.1
274	Female	18	Single	Student	23	21	184	73	17	0.08	0.12	6.9	5.2	110	194	0.62	10	2.9
275	Female	20	Single	Student	14	19	113	90	14	0.09	0.15	6.8	5.1	107	108	0.48	15	2.2
276	Female	18	Single	Student	20	19	207	120	6	0.09	0.12	7	4.8	166	175	0.51	10	2.6
277	Female	18	Single	Student	9	9	104	60	7	0.23	0.38	7.1	5.5	141	78	0.68	26	3.2
278	Female	18	Single	Student	15	13	218	53	8	0.1	0.17	7.1	5.3	127	92	0.5	15	2.3
279	Female	18	Single	Student	17	17	252	100	8	0.15	0.32	7	5.1	176	122	0.5	17	2
280	Male	22	Single	Student	16	19	138	64	23	0.14	0.21	7.2	4.9	95	58	0.84	24	3.3
281	Female	18	Single	Student	15	13	140	146	16	0.06	0.14	7	4.4	133	133	0.6	17	2.6
282	Female	19	Single	Student	12	13	98	60	7	0.17	0.29	7.1	5.8	133	82	0.61	13	3.1
283	Male	21	Single	Student	14	14	128	79	12	0.13	0.23	7.3	5.1	81	60	1.01	22	5.1
284	Female	22	Single	Student	11	11	179	67	8	0.34	0.59	6.7	4.3	142	209	0.51	19	4
285	Female	22	Single	Student	10	18	164	55	8	0.27	0.44	6.1	4.3	140	66	0.69	20	3.9
286	Female	24	Single	Student	9	13	117	67	12	0.25	0.44	6.8	4.4	145	68	0.59	22	4.1
287	Female	26	Single	Student	6	16	105	46	11	0.24	0.41	6.3	4.5	148	49	0.95	26	4.2
288	Female	22	Single	Student	7	10	162	105	7	0.32	0.59	7.1	5.2	154	62	0.79	21	4.3
289	Female	22	Single	Student	7	9	110	43	13	0.51	1.05	6.8	4.9	166	72	0.65	32	3.7
290	Female	22	Single	Student	6	12	144	80	13	0.22	0.34	6.7	4.7	158	63	0.73	29	2.9
291	Female	26	Single	Employed	7	19	63	59	11	0.09	0.14	5.2	3.5	114	41	0.75	28	2.4
292	Female	23	Single	Employed	5	12	97	84	8	0.13	0.23	6.8	4.7	124	48	0.67	21	3.5
293	Female	23	Single	Student	8	10	181	85	12	0.12	0.23	6.5	4.4	172	70	0.53	23	4.1
294	Male	19	Single	Student	15	33	245	195	17	0.2	0.27	7.4	4.9	116	84	0.74	28	3.5
295	Male	21	Single	Student	17	18	116	185	20	0.28	0.37	8	5	140	218	0.74	24	4.1
296	Male	18	Single	Student	14	19	147	338	22	0.22	0.28	8.3	5	116	64	0.86	19	4.3
297	Male	18	Single	Student	11	19	152	194	18	0.12	0.16	6.6	4.2	101	69	0.79	19	3.1
298	Female	18	Single	Student	13	17	189	171	17	0.17	0.23	8.3	5.4	143	185	0.63	18	3.3
299	Male	20	Single	Student	14	19	172	263	18	0.19	0.27	8	4.9	95	99	0.85	39	4.1
300	Male	20	Single	Student	16	19	294	204	18	0.37	0.55	8.6	5.4	152	174	0.9	32	4.1
301	Female	18	Single	Student	21	20	186	168	14	0.13	0.19	8.1	5	176	187	0.62	27	3.4
302	Female	18	Single	Student	19	18	191	111	17	0.24	0.31	7.7	4.3	118	139	0.58	34	2.9
303	Female	18	Single	Student	4	14	178	238	26	0.15	0.21	8.6	5.1	172	121	0.64	20	3.7
304	Male	19	Single	Student	13	63	144	128	20	0.21	0.31	7.8	5.1	167	236	0.85	30	4.1
305	Male	19	Single	Student	22	28	348	121	35	0.19	0.24	7.9	5	112	85	0.74	40	5.7
306	Male	19	Single	Student	11	19	306	264	17	0.32	0.54	7.5	4.8	120	108	0.69	30	3.4
307	Male	18	Single	Student	12	22	331	213	24	0.13	0.26	8.5	5.2	123	93	0.37	19	3.6
308	Male	20	Single	Student	11	19	221	158	19	0.46	0.64	9.2	5.5	124	56	0.9	21	4.9
309	Male	19	Single	Student	16	14	193	190	19	0.17	0.23	8.6	5.3	114	59	0.91	30	4.7
310	Male	18	Single	Student	10	17	158	222	14	0.2	0.3	8	5.1	110	80	0.85	18	3.7
311	Male	20	Single	Student	14	22	242	183	16	0.3	0.39	8.8	5	83	109	0.76	28	4.8
312	Male	18	Single	Student	23	23	157	128	50	0.46	0.71	8.9	5.3	153	80	0.72	31	5.7
313	Male	18	Single	Student	20	26	500	299	19	0.16	0.25	8	4.9	98	89	0.69	27	5.2
314	Female	18	Single	Student	9	16	244	123	10	0.28	0.4	7.7	4.5	100	69	0.61	32	2.7
315	Male	18	Single	Student	17	22	240	253	15	0.23	0.35	8.3	5.4	95	98	0.77	32	3.3
316	Female	18	Single	Student	12	10	191	146	12	0.12	0.17	7.5	4.9	187	126	0.67	25	3.5
317	Female	18	Single	Student	8	12	118	186	11	0.34	0.41	8.1	5	107	43	0.72	32	3.3
318	Female	18	Single	Student	9	15	194	116	13	0.17	0.25	7.2	4.5	164	65	0.73	18	3.5
319	Female	18	Single	Student	10	10	277	159	15	0.1	0.13	7.8	5.1	98	73	0.66	20	4.2
320	Male	20	Single	Student	11	19	187	189	19	0.31	0.5	9.3	4.9	149	81	0.91	16	4.4
321	Female	18	Single	Student	10	15	191	340	17	0.16	0.21	8.1	5.1	126	86	0.67	12	4.4
322	Female	18	Single	Student	17	18	131	114	12	0.21	0.33	8.2	5.1	134	75	0.63	28	3.4
323	Female	19	Single	Student	14	17	222	220	27	0.26	0.4	8.3	4.9	126	95	0.73	23	4.7
324	Female	19	Single	Student	10	17	189	215	15	0.11	0.16	8.6	4.9	146	141	0.75	33	3.8
325	Male	18	Single	Student	27	26	351	219	40	0.23	0.31	8.9	5.6	113	87	0.8	29	3.6
326	Male	19	Single	Student	10	16	212	208	13	0.19	0.28	8.1	4.8	101	50	0.9	17	5.8
327	Male	19	Single	Student	12	21	447	118	20	0.26	0.33	8.4	5.2	126	91	0.72	25	4.9
328	Male	18	Single	Student	15	27	397	191	21	0.18	0.24	7.8	4.8	115	90	0.65	25	4.8
329	Female	18	Single	Student	23	21	258	65	28	0.08	0.14	8.6	5.1	124	92	0.71	15	3.2
330	Male	18	Single	Student	20	22	274	152	19	0.22	0.35	8.6	5.4	151	69	0.84	15	4.4
331	Male	19	Single	Student	11	15	305	320	21	0.23	0.3	9	5.4	108	61	0.87	26	2.8
332	Male	19	Single	Student	20	23	354	126	58	0.36	0.56	9.1	5.9	170	182	0.81	18	3.4
333	Male	20	Single	Student	14	21	280	237	28	0.22	0.31	8.9	5.3	128	134	0.74	30	3.3
334	Male	20	Single	Student	13	24	355	184	17	0.2	0.27	8.3	5.4	111	57	0.79	23	3.2
335	Male	18	Single	Student	20	27	156	94	13	0.19	0.33	8.2	5.3	171	131	0.8	21	4.8
336	Male	19	Single	Student	16	24	553	127	25	0.2	0.27	7.9	4.9	125	132	0.8	26	4.9
337	Male	18	Single	Student	16	23	303	263	22	0.17	0.22	8.4	4.8	131	146	0.75	35	3.8
338	Male	18	Single	Student	22	13	272	138	24	0.39	0.66	8.1	5.1	157	142	0.7	25	5
339	Male	18	Single	Student	20	20	224	181	13	0.31	0.44	7.4	5	182	161	0.76	35	4.9
340	Male	18	Single	Student	16	22	424	219	13	0.44	0.66	7.6	4.8	112	63	0.69	17	4.9
341	Male	18	Single	Student	11	17	351	164	21	0.28	0.36	7.8	5.2	83	57	0.72	40	4.2
342	Male	18	Single	Student	12	25	396	289	24	0.26	0.45	8.7	5.8	130	116	0.9	23	4.9
343	Male	20	Single	Student	16	18	170	188	15	0.25	0.4	8.2	5.4	126	65	0.64	14	3.1
344	Female	20	Single	Student	9	15	239	231	11	0.19	0.25	8	5	117	41	0.71	18	5
345	Female	19	Single	Student	11	23	215	301	12	0.12	0.14	9.4	5.5	177	151	0.69	23	4.5
346	Female	18	Single	Student	16	23	317	299	21	0.09	0.15	9	5.6	134	114	0.69	15	4.2
347	Female	18	Single	Student	17	19	401	188	8	0.13	0.21	8.8	5.4	186	218	0.62	18	3.5
348	Female	18	Single	Student	45	54	294	184	23	0.17	0.27	9.6	6	145	120	0.76	30	3.5
349	Female	18	Single	Student	12	20	224	149	11	0.15	0.24	8.3	5.2	118	110	0.78	26.7	3.8
350	Female	19	Single	Student	13	24	169	240	14	0.15	0.19	8.3	5.3	119	101	0.67	20	4.6
351	Male	20	Single	Student	37	28	207	207	17	0.17	0.29	8.8	5.6	141	74	0.94	33	3.7
352	Male	18	Single	Student	19	38	199	276	16	0.17	0.25	9.9	6	181	53	0.94	32	6
353	Male	20	Single	Student	12	20	240	191	18	0.18	0.23	9.6	5.7	184	107	0.97	26	5.5
354	Male	20	Single	Student	13	21	277	268	45	0.51	0.89	10.1	6.3	178	125	1.02	22	5.5
355	Male	20	Single	Student	25	40	162	139	32	0.28	0.4	9.2	5.9	112	70	0.95	19	5.3
356	Male	20	Single	Student	29	34	190	193	53	0.34	0.34	9.2	6	139	95	0.96	24	5.9
357	Male	19	Single	Student	22	25	314	175	23	0.12	0.22	8.5	5.5	153	85	0.69	27	4
358	Female	18	Single	Student	10	18	288	319	16	0.23	0.38	9.5	6.2	201	134	0.73	25	2.6
359	Male	19	Single	Student	16	18	161	162	25	0.23	0.38	9.8	6.5	177	151	0.84	31	4.9
360	Male	18	Single	Student	16	26	457	367	30	0.13	0.21	9.1	5.4	101	128	0.75	30	4.9
361	Female	18	Single	Student	15	23	157	233	11	0.13	0.19	9.3	5.6	205	116	0.82	20	4.3
362	Female	19	Single	Student	12	8	199	185	17	0.18	0.22	8.9	5.5	104	46	0.95	25	4.4
363	Male	18	Single	Student	14	28	433	322	18	0.25	0.38	9.2	5.5	149	154	0.83	17	5.7
364	Female	20	Single	Student	17	31	160	201	13	0.19	0.21	8.8	5.3	135	79	0.75	22	2.1
365	Female	18	Single	Student	14	20	241	258	16	0.39	0.57	8.5	4.7	163	67	0.78	28	4.5
366	Female	19	Single	Student	14	28	394	173	17	0.19	0.25	9.6	5	128	137	0.7	17	4.4
367	Male	35	Married	Employed	13	17	177	186	21	0.79	1.71	9.6	6.2	237	143	1.05	32	4.8
368	Male	18	Single	Student	13	21	437	239	18	0.28	0.41	8.8	5.8	103	75	0.86	17	5.3
369	Male	20	Single	Student	15	28	208	179	42	0.35	0.53	10.2	6.2	118	73	0.93	29	5.3
370	Female	18	Single	Student	12	21	260	223	19	0.29	0.42	9	5.2	132	47	0.74	14	5.8
371	Male	19	Single	Student	19	25	427	170	18	0.24	0.35	9.5	5.5	144	187	0.79	38	5.3
372	Female	18	Single	Student	10	18	172	142	13	0.3	0.52	9	6	138	60	0.75	18	3.4
373	Female	18	Single	Student	14	23	162	230	13	0.1	0.16	8.7	5.2	163	148	0.77	21	3.7
374	Female	18	Single	Student	12	17	355	207	13	0.26	0.43	8.7	5.7	159	113	0.71	17	3.3
375	Male	19	Single	Student	13	16	222	333	11	0.17	0.26	8.6	5.6	183	86	0.77	18	3.5
376	Female	18	Single	Student	12	18	244	173	10	0.14	0.06	8.4	5.4	163	174	0.66	15	4.3
377	Male	19	Single	Student	45	23	189	150	92	0.21	0.26	9	5.3	199	188	0.8	23	6.4
378	Female	18	Single	Student	19	21	250	228	25	0.15	0.24	8.3	5.3	151	161	0.82	26	5.8
379	Female	18	Single	Student	20	25	454	306	23	0.26	0.38	8.3	5.5	106	97	0.7	23	4
380	Female	18	Single	Student	15	18	444	262	23	0.17	0.23	9.2	5.5	152	144	0.82	26	5
381	Female	18	Single	Student	19	24	228	259	15	0.13	0.19	8.2	5.3	191	147	0.83	39	4.2
382	Female	18	Single	Student	22	18	255	292	12	0.16	0.21	8.2	5.3	188	168	0.67	22	3.2
383	Female	18	Single	Student	15	19	438	155	23	0.28	0.41	8.7	5.1	156	96	0.66	26	5.5
384	Male	19	Single	Student	13	19	267	139	19	0.26	0.34	8.8	5.3	114	80	0.79	16	4.9
385	Female	19	Single	Student	22	19	260	116	17	0.14	0.18	8.3	4.9	133	74	0.7	26	3
386	Male	19	Single	Student	15	21	337	99	39	0.23	0.37	8.2	4.7	96	56	0.86	26	3.7
387	Male	18	Single	Student	14	17	357	198	19	0.1	0.13	8.5	5.3	169	122	0.65	14	3.5
388	Female	18	Single	Student	9	19	129	185	12	0.13	0.17	7.6	4.5	169	162	0.58	7	2.4
389	Female	18	Single	Student	9	10	148	120	10	0.15	0.22	8.2	4.7	109	71	0.62	45	2.4
390	Male	18	Single	Student	11	21	183	216	21	0.25	0.44	8.1	5.3	165	99	0.77	25	4.7
391	Male	20	Single	Student	36	25	174	227	66	0.19	0.33	8.9	5.8	226	203	0.85	25	6.2
392	Male	20	Single	Student	21	28	248	283	18	0.31	0.46	9.4	5.9	163	123	0.79	11	4.6
393	Male	18	Single	Student	15	26	176	255	10	0.15	0.22	7.8	5	135	93	0.66	28	4.1
394	Male	18	Single	Student	10	18	395	83	14	0.1	0.22	8.1	5.4	126	85	0.75	31	3.5
395	Male	19	Single	Student	12	18	412	176	15	0.17	0.25	9.1	5.3	131	188	0.73	22	4.4
396	Female	18	Single	Student	10	16	220	141	12	0.23	0.41	8.7	5.5	145	102	0.41	24	3.9
397	Male	18	Single	Student	9	20	550	198	21	0.24	0.32	8.5	5.8	117	87	0.74	35	5.8
398	Male	19	Single	Student	12	20	320	251	13	0.11	0.13	9.3	5.2	107	102	0.68	16	4.4
399	Male	18	Single	Student	14	23	338	114	29	0.28	0.36	9.1	5.6	130	53	0.82	22	4.3
400	Male	18	Single	Student	13	14	224	164	21	0.26	0.35	8.8	5.8	124	89	0.86	38	4
401	Female	18	Single	Student	11	21	304	208	16	0.31	0.45	10.1	6.1	155	90	0.81	21	4.4
402	Female	18	Single	Student	16	25	245	229	13	0.19	0.24	9.3	5.2	203	95	0.64	18	2.7
403	Female	18	Single	Student	9	14	323	117	11	0.11	0.14	8.5	5.6	190	89	0.66	6	5.1
404	Male	18	Single	Student	6	15	131	158	11	0.23	0.36	7.9	5.1	193	82	0.62	13	3
405	Female	18	Single	Student	10	14	192	184	14	0.14	0.19	8.4	5.4	129	134	0.77	12	4
406	Male	18	Single	Student	14	24	463	221	14	0.18	0.29	9.1	5.8	98	140	0.72	17	5.3
407	Male	19	Single	Student	12	18	239	302	14	0.26	0.36	8.4	5.1	93	44	0.6	22	3.9
408	Male	18	Single	Student	14	19	330	156	13	0.2	0.29	8.6	5.4	104	156	0.87	20	4.3
409	Male	18	Single	Student	10	20	418	317	14	0.38	0.58	8.4	5.3	127	182	0.77	25	7.2
410	Male	18	Single	Student	15	27	340	264	16	0.17	0.24	9.4	6	138	65	0.88	36	5.8
411	Male	20	Single	Student	14	21	199	248	14	0.26	0.34	8.6	5.7	171	95	0.73	19	3.8
412	Male	18	Single	Student	10	22	228	152	22	0.37	0.5	9.6	6	172	107	0.86	20	5.4
413	Male	18	Single	Student	19	27	0	205	23	0.16	0.24	9.8	5.8	139	169	0.8	19	4.3
414	Male	18	Single	Student	10	25	226	262	16	0.18	0.25	9.1	5.4	142	117	0.89	15	4.1
415	Male	18	Single	Student	9	24	324	193	15	0.17	0.21	8.8	5.4	114	110	0.88	19	5
416	Female	18	Single	Student	15	20	393	290	13	0.1	0.14	9.1	5.5	147	164	0.72	10	3.5
417	Female	18	Single	Student	15	19	197	182	14	0.15	0.23	9.2	5.5	135	86	0.79	15	3.4
418	Male	18	Single	Student	10	18	513	188	13	0.18	0.27	8.8	5.5	119	214	0.77	28	4.3
419	Male	19	Single	Student	23	31	179	308	16	0.17	0.21	8.6	4.8	148	165	0.96	30	5.6
420	Male	18	Single	Student	18	21	409	315	24	0.43	0.7	9	5.9	182	84	0.97	25	5.4
421	Male	18	Single	Student	11	21	474	114	16	0.15	0.22	8.7	5.8	119	177	0.99	35	5.4
422	Male	18	Single	Student	15	22	583	172	13	0.19	0.3	8.9	5.7	132	213	0.85	32	6.2
423	Male	18	Single	Student	19	21	212	273	20	0.13	0.17	8.7	5.3	162	81	0.68	20	3.4
424	Male	38	Married	Employed	13	15	125	65	12	0.19	0.25	7.7	5.3	137	69	0.82	22	4.2
425	Male	30	Married	Employed	37	33	304	204	67	0.2	0.32	9.3	6	233	164	1.14	25	6.2
426	Male	19	Single	Student	19	22	386	310	20	0.17	0.24	9.7	5.7	136	125	0.83	28	5.1
427	Male	19	Single	Student	13	14	323	245	16	0.25	0.38	10	5.7	135	129	0.8	23	6.1
428	Male	19	Single	Student	14	24	343	294	19	0.24	0.34	9.7	5.8	157	89	0.9	39	6
429	Male	19	Single	Student	12	21	478	273	27	0.28	0.33	10.9	6.1	150	124	1.04	23	4.3
430	Male	19	Single	Student	17	28	541	142	18	0.12	0.18	9.5	5.6	136	57	0.81	23	5.2
431	Male	18	Single	Student	13	16	450	314	46	0.24	0.33	8.9	5.5	166	78	0.77	26	3.9
432	Male	18	Single	Student	20	41	113	316	76	0.26	0.27	9.7	6	197	99	0.65	15	3.1
433	Male	19	Single	Student	17	23	179	161	13	0	0.34	9.4	5.8	125	88	0.94	44	5.9
434	Male	18	Single	Student	17	24	421	340	16	0.14	0.18	8.2	5.4	104	107	0.82	24	4.1
435	Male	32	Single	Employed	17	18	281	173	21	0.14	0.2	9.1	5.7	207	71	0.71	28	5.5
436	Female	18	Single	Student	20	26	127	202	18	0.16	0.23	9.2	5.7	201	160	0.87	25	3.9
437	Female	18	Single	Student	12	20	469	166	16	0.28	0.4	9.4	5.9	167	164	0.84	45	3.8
438	Female	18	Single	Student	12	14	231	173	16	0.13	0.18	9.7	6.4	214	108	1.12	50	2.8
439	Female	18	Single	Student	12	21	171	137	12	0.17	0.26	9.6	6	140	117	0.83	20	3.9
440	Male	18	Single	Student	13	21	414	141	19	0.2	0.28	8.1	5.3	154	143	0.75	21	4.1
441	Female	18	Single	Student	7	15	335	176	19	0.4	0.52	8.2	5.6	146	52	0.72	19	4.6
442	Male	20	Single	Student	20	31	236	145	23	0.18	0.27	8.9	5.4	155	138	0.88	23	5.6
443	Female	18	Single	Student	14	23	276	99	15	0.17	0.2	9.2	5.5	137	77	0.71	41	3.6
444	Male	20	Single	Student	16	30	398	212	19	0.22	0.34	8.9	5.7	182	221	0.77	18	5.5
445	Male	18	Single	Student	12	25	475	169	22	0.26	0.32	9.2	6.2	101	49	0.85	27	5.1
446	Male	19	Single	Student	13	19	154	173	15	0.18	0.25	7.8	5.1	143	63	0.74	31	5.1
447	Male	30	Married	Employed	18	21	201	283	16	0.64	1.15	7.9	5	138	127	0.91	30	5.7
448	Male	23	Married	Employed	13	14	135	207	12	0.63	1.12	7.5	4.9	94	85	1.02	24	4.7
449	Male	40	Married	Employed	3	12	109	138	15	0.18	0.26	6.6	4.1	155	163	0.87	16	4.8
450	Male	46	Married	Employed	15	24	169	197	17	0.25	0.32	7.9	4.3	128	65	0.84	30	4.7
451	Male	20	Married	Employed	25	39	110	104	35	0.6	0.7	6.6	4.2	116	70	0.97	12	4.9
452	Male	28	Married	Employed	11	17	174	127	17	0.19	0.32	7.2	4.5	113	253	1.01	22	5.2
453	Male	28	Married	Employed	18	23	244	173	29	0.23	0.33	8.8	5.7	212	207	0.93	20	5.1
454	Female	19	Single	Student	13	20	125	141	10	0.66	0.97	7.4	4.7	109	71	0.76	24	3.2
455	Female	21	Single	Student	15	19	142	134	13	0.29	0.44	7.5	4.5	173	51	0.7	13	3.4
456	Female	18	Single	Student	10	14	208	137	10	0.25	0.38	7.5	5	105	52	0.75	12	3.4
457	Female	18	Single	Student	8	15	122	246	11	0.24	0.31	8.7	5.4	122	60	0.77	23	3.3
458	Female	18	Single	Student	12	17	141	93	12	0.39	0.53	7.1	4.3	109	42	0.81	25	3
459	Male	18	Single	Student	18	27	239	124	13	0.31	0.46	8.1	4.8	123	99	0.79	29	4.2
460	Male	18	Single	Student	42	38	319	181	5	0.3	0.38	6.5	4.3	146	89	0.78	28	5.7
461	Female	18	Single	Student	12	19	225	171	13	0.21	0.32	8.6	5.1	202	154	0.74	24	3.2
462	Female	18	Single	Student	16	21	181	171	12	0.19	0.26	9.1	5.2	148	106	0.6	24	3.7
463	Female	18	Single	Student	10	19	185	145	10	0.21	0.28	7.9	5	136	73	0.73	31	4.4
464	Female	18	Single	Student	24	27	257	224	18	0.13	0.19	7.9	5	174	109	0.65	16	2.9
465	Male	19	Single	Student	12	19	218	218	10	0.35	0.54	8.1	5.2	131	109	0.8	20	4.4
466	Female	22	Single	Student	18	26	128	230	10	0.19	0.26	8.1	5	130	68	0.72	12	2.9
467	Male	18	Single	Student	12	25	317	124	14	0.27	0.33	7.6	5.1	115	59	0.83	22	3.7
468	Female	20	Single	Student	13	20	173	151	11	0.23	0.31	8	4.9	132	76	0.81	26	2.5
469	Female	19	Single	Student	10	21	156	144	14	0.71	0.9	8	5.2	85	36	0.78	18	3.5
470	Male	19	Single	Student	27	27	294	170	50	0.25	0.32	8	5.2	113	71	0.93	20	3.3
471	Female	19	Single	Student	24	28	219	199	13.4	0.35	0.44	8	5.5	100	58	0.79	21	4
472	Female	21	Single	Student	11	16	381	129	12	0.22	0.27	6.8	4.5	134	56	0.71	15	2.7
473	Female	20	Single	Student	11	18	304	183	14	0.23	0.35	8.4	5.3	160	180	0.76	26	5.4
474	Female	22	Single	Student	30	24	161	240	21	0.2	0.27	8.7	5.5	175	163	0.87	15	4.3
475	Female	21	Single	Student	23	19	232	108	89	0.17	0.22	8.4	5	169	67	0.8	12	3.6
476	Female	24	Single	Student	14	23	149	186	13	0.36	0.43	7.9	5	97	43	0.84	24	3.1
477	Male	18	Single	Student	20	28	385	124	24	0.4	0.51	8.1	4.8	115	45	0.85	14	4.2
478	Male	20	Single	Student	24	28	175	119	33	0.64	0.8	8.1	4.8	77	42	0.77	20	4.4
479	Female	20	Single	Student	17	25	276	152	24	0.26	0.37	8.9	5.2	152	75	0.75	16	3.5
480	Male	19	Single	Student	32	29	209	167	37	0.08	0.61	8.4	5.3	142	86	0.79	21	3.7
481	Male	18	Single	Student	21	35	205	220	21	0.3	0.38	8.3	4.9	89	45	0.91	22	4.9
482	Male	18	Single	Student	17	24	124	135	17	0.19	0.21	8.2	4.7	84	63	0.85	21	5.7
483	Female	18	Single	Student	15	19	217	232	11	0.17	0.19	7.8	4.6	93	63	0.76	12	2.8
484	Male	18	Single	Student	20	25	366	77	18	0.35	0.41	8.2	5.3	74	48	0.9	15	3.3
485	Male	19	Single	Student	13	19	183	332	15	0.3	0.35	9.3	4.6	119	77	0.8	22	5.3
486	Male	20	Single	Student	17	23	153	193	17	0.4	0.46	7.3	4.5	100	65	0.87	17	4.3
487	Female	18	Single	Student	17	19	165	122	16	0.19	0.2	6.8	4.1	101	76	0.8	19	3
488	Female	18	Single	Student	10	20	186	198	14	0.22	0.27	7.1	4.7	125	40	0.8	30	3.1
489	Male	19	Single	Student	18	18	152	183	15	0.17	0.21	7.5	4.4	113	68	0.76	19	2.7
490	Female	18	Single	Student	14	21	183	196	10	0.28	0.4	7.5	4.6	146	108	0.75	31	2.8
491	Male	18	Single	Student	20	28	381	131	48	0.42	0.47	7.3	4.5	100	117	0.94	14	5.1
492	Male	20	Single	Student	14	20	109	139	14	0.31	0.41	7.3	4.6	89	55	0.94	32	3.2
493	Female	18	Single	Student	10	58	268	244	4	0.66	1.01	7.7	4.9	120	62	0.88	33	3.9
494	Female	18	Single	Student	11	18	172	231	9	0.19	0.22	6.9	4.5	91	54	0.84	41	1.9
495	Female	22	Single	Student	11	17	187	136	11	0.19	0.23	7.9	5	101	60	0.75	31	3
496	Male	19	Single	Student	14	24	406	352	20	0.01	0.42	7.4	4.5	85	73	0.88	31	4.4
497	Female	18	Single	Student	16	27	151	63	18	0.27	0.3	6.9	4.4	129	83	0.84	32	3.2
498	Female	18	Single	Student	9	17	194	109	16	0.13	0.15	7.6	4.9	153	115	0.8	16	4
499	Male	18	Single	Student	15	27	196	184	13	0.4	0.5	7.9	5.1	119	94	0.84	39	3.8
500	Female	19	Single	Student	9	16	227	152	16	0.26	0.31	8	5.1	134	131	0.78	28	3.6
501	Male	18	Single	Student	14	17	295	111	26	0.32	0.42	8.4	5.4	162	226	0.77	27	4.9
502	Female	19	Single	Student	15	22	226	82	11	0.23	0.33	8.4	5.3	129	67	0.73	23	3.7
503	Male	20	Single	Student	12	18	166	106	25	0.37	0.47	7.7	4.7	81	59	0.85	31	4.1
504	Female	18	Single	Student	10	18	277	56	13	0.18	0.27	9.3	5.4	133	75	0.71	35	3.4
505	Male	22	Single	Student	10	16	252	92	21	0.48	0.65	7.9	5	135	84	0.75	38	4.4
506	Male	18	Single	Student	20	30	311	152	12	0.68	1.21	7.5	5	116	130	0.67	28	4.9
507	Male	20	Single	Student	13	31	193	354	24	0.28	0.56	8.5	5	84	85	0.85	28	5.1
508	Male	21	Single	Student	13	26	136	169	70	0.5	0.71	8.4	5.4	179	45	0.81	26	3
509	Female	19	Single	Student	9	18	166	84	10	0.21	0.29	8.5	5.6	144	67	0.61	20	3.5
510	Male	19	Single	Student	13	21	306	171	12	0.41	0.68	8.5	5.3	140	115	0.86	37	4.5
511	Male	18	Single	Student	12	21	501	121	10	0.24	0.36	5.8	3.9	132	132	0.66	16	3.6
512	Female	19	Single	Student	13	16	153	186	14	0.26	0.37	8.3	5.3	149	64	0.61	14	3.9
513	Female	20	Single	Student	11	17	400	327	12	0.15	0.18	8.9	5.8	122	133	0.79	12	5.3
514	Male	18	Single	Student	8	13	420	192	13	0.15	0.19	7.8	4.9	78	107	0.74	16	5.2
515	Male	19	Single	Student	19	24	183	133	29	0.13	0.17	8.6	5.5	142	92	0.89	12	3.4
516	Female	18	Single	Student	16	36	134	166	17	0.14	0.14	8.7	5.6	128	69	0.72	18	3.5
517	Male	19	Single	Student	9	16	160	149	12	0.24	0.32	8	5.3	100	50	0.84	25	4.7
518	Female	19	Single	Student	10	16	149	196	10	0.19	0.25	6.6	4.5	137	81	0.44	12	3.2
519	Female	18	Single	Student	30	33	282	198	11	0.16	0.17	8.6	5.1	115	115	0.68	13	3
520	Female	19	Single	Student	11	15	165	190	22	0.26	0.38	8.4	5.3	82	66	0.7	14	3.3
521	Male	18	Single	Student	11	17	139	122	20	0.25	0.32	7.9	5.2	139	186	0.83	29	4.8
522	Male	20	Single	Student	6	16	326	190	15	0.26	0.32	7.9	5.1	134	63	0.95	20	4.2
523	Male	20	Single	Student	36	35	303	199	56	0.24	0.36	8.2	5.5	178	109	0.78	18	6.4
524	Female	18	Single	Student	16	19	166	195	24	0.17	0.21	8.7	5.3	146	250	0.7	24	3.7
525	Male	20	Single	Student	13	10	371	224	16	0.2	0.25	8.1	5.3	93	57	0.73	14	4
526	Male	29	Single	Student	20	23	191	158	24	0.24	0.35	8.3	5.9	99	83	0.77	9	5.3
527	Male	19	Single	Student	11	14	165	145	17	0.46	0.72	7.9	4.8	113	97	0.78	18	5.7
528	Male	18	Single	Student	15	21	236	153	14	0.8	1.29	8.2	5.1	111	92	0.69	17	4.4
529	Male	18	Single	Student	10	20	322	132	14	0.47	0.79	7.9	5	114	64	0.78	17	3.9
530	Male	18	Single	Student	14	21	164	151	16	0.35	0.39	8.5	5.5	117	55	0.77	17	4.8
531	Male	19	Single	Student	17	23	279	192	11	0.23	0.32	8.2	5.2	122	138	0.67	12	2.7
532	Female	19	Single	Student	10	19	154	174	17	0.37	0.46	8.2	5.1	121	83	0.6	24	3.2
533	Female	20	Single	Student	9	12	141	254	16	0.61	1.18	8.7	5.5	128	60	0.73	11	2.3
534	Female	18	Single	Student	10	20	277	154	17	0.27	0.37	8.9	5.2	170	126	0.77	19	4.9
535	Male	18	Single	Student	10	26	350	267	17	0.31	0.38	8.2	5	92	48	0.7	18	6.2
536	Male	22	Single	Student	11	21	204	100	29	0.27	0.36	8.6	5.3	148	70	0.88	15	5.5
537	Male	19	Single	Student	12	21	367	193	14	0.22	0.3	7.4	4.8	104	69	0.71	25	4.6
538	Male	20	Single	Student	13	22	281	166	16	0.27	0.37	9	5.5	150	61	0.83	31	3.7
539	Male	19	Single	Student	8	15	375	246	17	0.21	0.25	7.4	4.6	81	50	0.71	16	5.4
540	Female	18	Single	Student	11	17	575	248	13	0.18	0.24	8.3	5	126	110	0.73	26	3.3
541	Female	18	Single	Student	10	16	132	192	15	0.23	0.3	8.2	5	140	112	0.66	9	5
542	Male	22	Single	Student	15	22	186	178	42	0.51	0.86	8	5.2	145	152	0.87	25	4
543	Male	19	Single	Student	17	25	249	267	46	0.19	0.22	8.1	5.5	89	82	0.75	35	5.1
544	Female	18	Single	Student	11	12	191	57	12	0.18	0.21	8.6	5.1	136	112	0.78	14	5.1
545	Female	18	Single	Student	11	22	215	228	11	0.24	0.35	9	5.1	129	104	0.72	10	3.8
546	Female	20	Single	Student	9	14	164	169	11	0.15	0.19	8.3	5.2	115	78	0.73	11	4.4
547	Female	20	Single	Student	15	17	166	144	11	0.18	0.25	8.1	5	155	68	0.66	20	2.6
548	Female	19	Single	Student	8	12	156	126	10	0.14	0.18	7.8	5	139	64	0.69	36	3.7
549	Female	20	Single	Student	7	10	108	141	10	0.22	0.29	5.6	3.6	111	35	0.57	28	2.7
550	Female	19	Single	Student	10	15	212	168	9	0.15	0.16	8.1	4.5	149	95	0.6	12	3
551	Female	18	Single	Student	10	19	177	188	12	0.36	0.51	8.2	5.1	108	109	0.65	17	3.7
552	Female	21	Single	Student	15	15	160	86	12	0.21	0.3	8.3	5.2	214	88	0.76	25	3.5
553	Male	19	Single	Student	13	20	338	144	15	0.46	0.73	8.8	5.6	139	102	0.76	30	4
554	Male	24	Single	Student	24	24	261	136	26	0.25	0.33	7.5	4.6	164	173	0.87	15	6.4
555	Female	18	Single	Student	11	23	174	127	13	0.17	0.21	7.5	4.5	119	50	0.74	17	4
556	Male	19	Single	Student	15	21	151	136	16	0.22	0.33	8.1	5	131	77	0.86	25	4.9
557	Female	18	Single	Student	13	19	168	105	13	0.2	0.27	8	5.3	165	43	0.69	19	3.2
558	Male	19	Single	Student	17	28	205	277	13	0.04	0.75	9.5	6.9	127	54	1.07	26	5
559	Male	19	Single	Student	11	19	219	153	16	0.2	0.21	6.9	4.6	97	80	0.75	22	5
560	Female	18	Single	Student	5	10	143	118	7	0.13	0.17	5.7	3.4	103	80	0.51	19	3.3
561	Male	18	Single	Student	16	19	149	151	9	0.22	0.3	7.3	4.7	97	54	0.8	36	6.5
562	Male	18	Single	Student	15	21	251	118	15	0.23	0.34	7.7	4.9	144	140	0.67	28	4
563	Male	18	Single	Student	10	17	453	157	13	0.38	0.55	8.3	5.3	128	92	0.87	25	5.4
564	Male	20	Single	Student	22	25	244	282	26	0.31	0.39	7.7	4.7	112	55	0.92	33	4.2
565	Male	21	Single	Student	11	20	198	225	25	0.36	0.53	8.9	5.5	139	153	0.81	21	4.1
566	Male	19	Single	Student	14	24	388	161	15	0.7	1.16	8.8	5.7	163	112	0.75	41	4.1
567	Male	18	Single	Student	10	15	274	189	19	0.24	0.32	8	5.1	140	126	0.64	13	3.5
568	Female	19	Single	Student	7	13	234	99	14	0.2	0.25	7.5	5.1	101	79	0.58	17	3.1
569	Male	20	Single	Student	15	24	431	256	16	0.24	0.29	8.1	5	101	62	0.72	15	6.4
570	Female	20	Single	Student	26	18	134	218	20	0.24	0.32	8.4	5.1	135	43	0.72	15	3.4
571	Male	20	Single	Student	12	25	203	143	14	0.66	1.11	7.6	5.2	148	83	0.79	19	4
572	Female	20	Single	Student	13	21	236	173	12	0.26	0.32	8	5	114	55	0.79	16	3.5
573	Male	20	Single	Student	10	17	173	147	13	0.21	0.28	7.6	5.2	100	85	0.76	12	3.7
574	Male	19	Single	Student	9	21	474	195	18	0.22	0.33	8.3	5.6	118	106	0.86	29	6.7
575	Female	19	Single	Student	14	20	234	189	11	0.23	0.29	8.1	5.2	129	52	0.66	15	3.4
576	Female	19	Single	Student	15	19	188	134	12	0.12	0.17	7.8	4.6	141	141	0.64	21	3
577	Female	20	Single	Student	16	23	181	194	10	0.21	0.28	8.2	5.2	117	64	0.73	16	3.6
578	Female	18	Single	Student	9	17	203	119	15	0.23	0.29	8	5.4	130	58	0.77	33	4.8
579	Male	20	Single	Student	12	28	264	144	15	0.36	0.46	8	4.8	111	60	0.83	19	4.7
580	Female	20	Single	Student	31	30	125	142	29	0.18	0.26	8.2	5.4	174	122	0.74	17	3.9
581	Female	19	Single	Student	10	13	161	183	11	0.25	0.33	7.8	5.1	139	102	0.64	20	4.4
582	Male	18	Single	Student	11	21	240	101	17	0.42	0.6	8.7	5.2	134	63	0.67	26	5.3
583	Female	18	Single	Student	12	13	197	120	14	0.68	0.95	8.1	5.3	157	86	0.68	24	4.7
584	Female	18	Single	Student	17	25	218	132	11	0.19	0.31	7.8	4.8	147	107	0.71	27	2.7
585	Female	18	Single	Student	12	15	267	195	14	0.19	0.29	7.7	4.8	165	98	0.7	19	3.8
586	Female	20	Single	Student	13	16	138	149	14	0.23	0.33	7.5	4.7	136	77	0.75	14	4
587	Male	19	Single	Student	13	23	533	135	21	0.26	0.37	7.5	4.8	134	127	0.71	29	5.5
588	Male	19	Single	Student	18	19	298	194	48	0.4	0.69	9	5.5	170	128	0.81	34	6.9
589	Female	20	Single	Student	12	19	403	166	15	0.31	0.46	8.4	5.6	160	104	0.81	29	5.9
590	Female	18	Single	Student	11	15	205	357	19	0.21	0.33	8.4	5.4	160	106	0.69	23	2.9
591	Female	18	Single	Student	12	14	232	155	19	0.19	0.27	8.1	5	124	64	0.63	20	2.8
592	Male	18	Single	Student	21	40	474	25	20	0.31	0.34	5.2	3.3	115	56	0.76	20	3.6
593	Male	18	Single	Student	11	19	0	159	19	0.23	0.34	7.8	5	116	116	0.58	24	5.1
594	Male	18	Single	Student	19	34	345	157	21	0.29	0.4	8.1	5.2	141	45	0.77	22	6.4
595	Male	18	Single	Student	10	18	423	159	11	0.27	0.35	8.2	5.3	122	74	0.75	30	5.8
596	Female	18	Single	Student	15	16	154	205	17	0.19	0.3	8.2	5.3	131	77	0.63	41	3.9
597	Female	19	Single	Student	10	24	148	94	17	0.09	0.13	5.5	3.1	108	103	0.99	22	3.6
598	Female	20	Single	Student	9	22	143	67	10	0.15	0.31	6.3	4.1	160	58	0.75	24	2.4
599	Male	22	Single	Student	13	35	163	48	11	0.14	0.25	6.2	4.5	104	40	0.76	25	3.1
600	Male	22	Single	Student	13	35	163	48	11	0.14	0.25	6.2	4.5	104	40	0.76	25	3.1
601	Female	23	Single	Student	7	33	78	71	9	0.2	0.33	5.6	4.4	141	53	0.7	21	2.3
602	Male	35	Married	Student	32	29	0	47	12	0.21	0.27	6.7	4.4	164	110	0.63	16	5.9
603	Female	18	Single	Student	10	16	0	37	10	0.13	0.21	5.9	4.2	112	43	0.65	26	2.7
604	Male	22	Single	Student	11	25	0	115	14	0.47	1.06	6.5	4.6	103	90	0.9	39	5.8
605	Female	23	Single	Student	5	35	94	74	9	0.23	0.37	6.6	4.5	121	35	0.84	22	3.2
606	Female	22	Single	Student	11	31	0	62	8	0.22	0.23	6.9	4.8	103	60	0.75	29	4.7
607	Male	19	Single	Student	8	44	160	100	12	0.51	0.91	6	4.6	91	39	0.87	37	4.9
608	Male	21	Single	Student	11	23	0	66	15	0.28	0.35	6.4	4	132	134	0.84	21	4.4
609	Male	19	Single	Student	10	17	0	50	13	0.85	1.04	6.5	5.1	118	36	0.98	45	5.2
610	Female	20	Single	Student	6	20	0	69	11	0.09	0.17	6.8	4.5	118	49	0.66	16	3.4
611	Male	21	Single	Student	12	31	0	85	15	0.23	0.31	5.9	4.5	87	47	0.81	24	4.9
612	Male	22	Single	Student	15	21	0	68	76	0.14	0.29	5.6	4	141	140	0.93	21	4.2
613	Female	22	Single	Student	9	36	94	57	12	0.27	0.49	6.1	3.7	128	153	0.64	25	4.2
614	Female	18	Single	Student	21	25	0	136	8	0.01	0.5	5.2	4	83	61	0.92	12	3.5
615	Male	23	Single	Student	28	19	0	61	11	0.23	0.45	6	3.8	97	45	0.82	22	2.4
616	Male	24	Single	Student	10	17	0	145	10	0.17	0.29	5.8	3.9	101	44	0.43	19	8
617	Male	22	Single	Student	16	51	170	23	13	0.41	0.86	6.5	4.7	89	72	0.86	17	5.6
618	Male	22	Single	Student	12	20	0	54	14	0.85	1.05	6.4	5	109	47	1.06	40	5.1
619	Male	35	Married	Employed	9	22	122	39	16	0.36	0.67	7.1	5.5	143	70	0.96	27	5.4
620	Female	28	Married	Merchant	12	31	149	51	16	0.25	0.5	6.9	4	138	58	0.77	33	4.6
621	Male	52	Married	Employed	22	20	98	128	14	0.58	0.92	6.1	4.5	144	71	0.95	28	3.3
622	Male	19	Single	Student	22	53	192	91	18	0.18	0.24	9.8	7.3	215	93	0.83	50	5.1
623	Male	20	Single	Student	6	31	0	93	25	0.17	0.22	7.1	4.2	203	89	0.95	8	3.7
624	Female	20	Single	Student	5	14	0	48	9	0.24	0.33	6.5	4.6	137	33	0.75	19	3.2
625	Female	21	Single	Student	20	49	98	51	16	0.18	0.32	5.7	3.9	128	58	0.94	14	3
626	Male	19	Single	Student	27	40	0	83	19	0.27	0.4	7.4	4.6	145	115	0.9	43	5.4
627	Male	25	Single	Student	21	28	0	50	12	0.2	0.27	6.5	4.5	168	115	0.57	20	5.8
628	Male	19	Single	Student	9	17	0	104	13	0.15	0.3	6.7	4.5	200	81	0.7	16	4.5
629	Female	19	Single	Student	11	21	0	50	13	0.85	1.07	6.6	5.1	112	121	0.95	42	5.2
630	Female	30	Married	Employed	8	26	47	54	10	0.1	0.18	5.4	3.4	96	76	0.7	17	2.8
631	Female	21	Single	Student	14	26	0	74	13	0.09	0.14	6.3	4.3	167	170	0.76	25	4.1
632	Male	21	Single	Student	6	14	0	32	8	0.11	0.18	5.1	3.5	94	30	0.55	19	2.4
633	Male	21	Single	Student	14	23	0	63	36	0.2	0.37	6.6	3.4	160	255	0.65	22	4.6
634	Male	22	Single	Student	26	25	0	107	8	0.19	0.4	6.5	4	173	64	0.58	26	3.9
635	Male	19	Single	Student	8	24	0	69	8	0.12	0.23	7.3	4.9	104	70	0.76	24	4.6
636	Female	20	Single	Student	9	24	0	95	19	0.16	0.3	5.6	3.9	93	96	1.04	21	3.5
637	Male	20	Single	Student	7	30	0	80	13	0.23	0.42	6.9	4.4	165	46	0.81	31	4
638	Female	23	Single	Student	9	28	146	44	9	0.18	0.24	5.9	4.6	130	57	0.81	21	4
639	Female	21	Single	Student	23	31	172	76	21	0.23	0.38	6.6	4.9	151	77	0.8	15	6.1
640	Male	22	Single	Student	11	19	0	65	75	0.13	0.25	5.7	4	134	140	0.87	21	4
641	Male	19	Single	Student	23	33	0	88	14	0.1	0.23	7.7	4.8	146	141	0.53	8	4.2
642	Male	20	Single	Student	11	23	0	62	8	0.09	0.2	7.2	4.9	99	57	0.76	21	4.4
643	Male	29	Single	Employed	13	22	139	30	19	0.22	0.37	6.2	4.3	131	47	0.97	22	5.8
644	Male	20	Single	Student	29	20	0	89	13	0.26	0.21	7.1	4.5	138	195	0.56	20	4.2
645	Male	27	Married	Employed	5	13	0	108	14	0.22	0.53	6.6	4.7	165	63	0.96	25	7
646	Female	20	Single	Student	8	24	0	107	20	0.07	0.15	6.2	3.2	121	135	0.78	21	4
647	Female	28	Married	Employed	15	34	0	100	32	0.13	0.19	6.1	3.8	196	83	0.68	19	3.7
648	Female	19	Single	Student	14	35	0	63	5	0.19	0.22	7.2	4.9	104	62	0.72	31	4.7
649	Female	20	Single	Student	10	27	0	87	14	0.16	0.31	6	4.4	82	47	0.83	21	5.2
650	Male	19	Single	Student	6	24	0	63	14	0.38	0.3	6.4	4.3	121	66	0.48	16	3.6
651	Male	21	Single	Student	10	28	0	56	12	0.3	0.54	6.3	4.3	148	95	0.65	22	4.6
652	Male	19	Single	Student	6	20	0	52	11	0.19	0.34	6.9	4.3	138	62	0.73	19	3.3
653	Male	18	Single	Student	14	31	0	85	11	0.17	0.24	7.3	4.9	117	81	0.67	22	3.5
654	Male	19	Single	Student	12	32	0	38	8	0.18	0.26	6.7	4.2	157	99	1.05	22	4
655	Male	21	Single	Student	22	34	172	101	11	0.15	0.23	6.9	4.4	163	50	0.5	24	4.5
656	Female	21	Single	Student	35	53	174	27	44	0.16	0.19	6.4	4.4	139	109	0.28	36	3.5
657	Male	28	Single	Merchant	27	47	184	24	43	0.15	0.19	6.6	4.5	128	102	0.76	44	3.4
658	Male	28	Single	Daily laborer	17	29	116	74	12	0.13	0.28	6.4	4	109	106	0.94	21	2.7
659	Male	22	Single	Student	5	27	115	24	5	0.15	0.2	5.8	4.1	126	43	0.76	21	3.7
660	Male	26	Single	Student	7	19	138	60	14	0.01	0.17	6.9	4.8	147	59	0.18	20	2.5
661	Male	22	Single	Student	16	22	136	29	1	0.12	0.26	5.4	3.8	127	63	0.84	12	3
662	Male	18	Single	Student	4	21	109	67	8	0.26	0.45	6.9	4.7	156	46	0.73	15	3.9
663	Female	19	Single	Student	7	15	159	86	12	0.16	0.29	7	4.8	122	60	0.51	17	4.7
664	Female	20	Single	Student	16	23	230	59	7	0.25	0.29	5.8	3.5	76	37	0.76	14	3.1
665	Female	23	Single	Student	11	33	215	91	29	0.15	0.21	6.1	3.9	179	74	0.61	22	3.7
666	Male	20	Single	Student	19	31	140	85	20	0.54	0.83	6.6	4.5	99	69	0.69	44	6.1
667	Female	21	Single	Student	9	23	99	35	12	0.08	0.18	5.1	3.6	125	43	0.92	18	3.1
668	Female	19	Single	Student	37	23	116	34	6	0.12	0.27	6.5	4.3	149	95	0.69	24	3.8
669	Female	21	Single	Student	4	15	165	49	6	0.15	0.28	6.3	4.1	138	69	0.68	15	3.2
670	Male	20	Single	Student	25	24	112	30	7	0.01	0.25	7.2	4.1	151	95	0.68	20	3.8
671	Female	22	Single	Student	9	40	156	56	10	0.18	0.25	6.3	4.6	95	32	0.8	30	4
672	Male	26	Single	Student	6	16	137	57	10	0.25	0.46	6.1	4	101	47	0.83	24	3.8
673	Female	21	Single	Student	11	20	152	73	16	0.24	0.39	7.5	4.6	135	175	0.88	37	4.7
674	Female	22	Single	Student	8	22	82	54	10	0.32	0.58	6.2	4.3	102	68	1.19	32	5.5
675	Female	20	Single	Student	11	23	108	79	10	0.21	0.39	6.6	4.2	159	46	0.92	26	4
676	Female	21	Single	Student	25	40	174	20	7	0.53	0.75	6.6	4.6	92	98	0.88	16	5.8
677	Female	21	Single	Student	11	22	92	54	8	0.04	0.24	6.3	4.1	148	70	0.85	9	1.7
678	Female	19	Single	Student	17	29	163	64	27	0.76	1.39	6.2	4.3	113	131	1.1	23	4.7
679	Male	35	Married	Employed	6	24	0	30	7	0.1	0.15	4.7	3.1	84	52	0.54	19	2.3
680	Female	18	Single	Student	6	45	95	51	10	0.12	0.17	6.2	4	110	45	0.8	19	4.9
681	Male	20	Single	Student	9	23	0	50	10	0.24	0.24	7	4.3	183	129	1.04	18	4.1
682	Female	22	Single	Student	9	25	222	84	32	0.28	0.55	5.3	3.4	102	60	0.99	33	3.1
683	Male	22	Single	Daily laborer	9	26	0	73	11	0.12	0.19	6.7	4.5	115	49	0.61	21	4.6
684	Male	19	Single	Student	19	26	154	114	15	0.16	0.24	6.7	4.6	88	40	0.9	26	5.4
685	Male	20	Single	Student	26	22	0	69	8	0.15	0.24	7.5	4.6	213	109	0.55	15	3.9
686	Female	21	Single	Student	21	24	170	33	40	0.44	0.66	6	4.7	131	34	0.76	22	1.7
687	Female	19	Single	Student	4	14	130	94	12	0.17	0.27	6.5	4.2	197	92	0.73	30	4.5
688	Female	20	Single	Student	3	24	153	52	9	0.17	0.22	6	4.5	130	54	0.81	17	4.2
689	Female	20	Single	Student	8	19	0	59	6	0.25	0.45	6.7	4.1	111	82	0.24	29	4.2
690	Female	21	Single	Student	7	22	0	44	30	0.11	0.16	5.4	3.9	103	36	0.87	22	3.1
691	Male	20	Single	Student	7	32	0	29	12	0.14	0.21	6.3	4.4	135	47	0.76	21	3.9
692	Female	20	Single	Student	15	22	302	73	20	0.34	0.49	6.7	4.6	74	35	0.83	25	5.7
693	Female	22	Single	Student	6	14	154	87	12	0.19	0.34	6.9	4.7	120	55	0.87	22	4.8
694	Male	20	Single	Student	20	27	0	64	7	0.01	0.23	6.8	4.3	168	88	0.81	17	3.9
695	Female	22	Single	Student	13	20	0	70	76	0.16	0.27	6	4	134	131	0.88	25	4.2
696	Male	19	Single	Student	17	26	0	85	10	0.14	0.19	7.1	4.6	220	130	0.27	19	4.6
697	Female	18	Single	Student	8	14	0	33	8	0.14	0.2	5.8	3.7	122	69	0.64	20	2.9
698	Female	19	Single	Student	23	31	0	88	15	0.21	0.32	6.6	4.4	86	80	0.87	26	6
699	Male	20	Single	Student	7	24	129	54	11	0.17	0.3	5.8	4.2	111	57	0.74	14	3.5
700	Female	19	Single	Student	6	22	0	83	14	0.16	0.28	6.8	4.2	66	65	0.79	15	4.9
701	Female	27	Single	Employed	8	22	0	61	12	0.2	0.36	6.5	4.5	160	64	0.74	23	2.7
702	Female	19	Single	Student	7	16	0	34	9	0.12	0.2	6.4	3.9	149	61	0.66	25	3.1
703	Male	19	Single	Student	22	29	0	140	6	0.2	0.44	5.4	4	86	61	0.95	24	3.8
704	Male	24	Single	Student	15	34	0	63	8	0.08	0.24	7	4.9	102	58	0.7	31	4.7
705	Male	19	Single	Student	6	22	0	71	13	0.3	0.49	6.5	4	139	39	0.77	14	3
706	Female	25	Single	Student	4	20	0	105	22	0.26	0.41	7.1	4.8	112	48	0.82	17	2.7
707	Female	18	Single	Student	7	31	0	29	11	0.15	0.2	6.6	4.3	134	47	0.83	29	3.7
708	Male	22	Single	Student	8	17	0	51	13	0.85	1.1	6.6	5.1	110	39	0.91	39	4.9
709	Male	25	Single	Student	9	24	118	54	8	0.32	0.57	6.3	4.2	134	67	0.75	27	4.1
710	Male	19	Single	Student	8	21	0	101	22	0.24	0.4	7.1	4.7	116	59	0.81	21	2.8
711	Female	18	Single	Student	6	17	152	53	16	0.14	0.19	6.3	4.2	115	52	0.81	17	5
712	Male	20	Single	Student	6	22	0	97	10	0.16	0.27	6.6	4.5	166	88	0.64	18	3.5
713	Female	18	Single	Student	9	19	0	71	10	0.16	0.27	6.1	4.1	115	41	0.76	28	2.8
714	Male	19	Single	Student	9	18	123	61	11	0.16	0.26	6.8	4.4	115	49	0.77	20	2.9
715	Male	33	Married	Employed	31	35	0	48	20	0.22	0.39	6.5	4.1	94	42	0.86	14	4.1
716	Male	24	Single	Student	7	20	117	63	14	0.17	0.24	6.5	4	124	96	0.83	22	4.7
717	Male	20	Single	Student	6	26	115	58	9	0.24	0.38	6.3	4.2	114	41	0.62	20	3.4
718	Female	19	Single	Student	31	40	0	83	23	0.25	0.4	7.7	4.7	139	96	0.95	19	5.4
719	Female	23	Single	Student	7	21	0	103	22	0.17	0.37	6.9	4.7	111	43	1.02	22	2.8
720	Male	20	Single	Student	20	18	156	48	9	0.14	0.27	6.1	3.9	132	54	0.86	23	4.3
721	Male	19	Single	Student	18	23	194	79	22	0.26	0.44	6.9	4.4	168	117	0.7	16	6.3
722	Male	19	Single	Student	6	22	108	79	10	0.21	0.42	6.8	4.2	159	46	0.87	24	4.1
723	Male	19	Single	Student	13	27	181	55	10	0.18	0.28	6.9	4.6	113	57	0.79	17	3.3
724	Male	20	Single	Student	8	23	202	82	7	0.39	0.58	6.5	4.4	55	29	0.81	24	4.8
725	Female	19	Single	Student	8	23	114	43	29	0.12	0.18	5.5	3.7	105	38	0.88	22	3.1
726	Female	29	Single	Student	9	32	99	59	11	0.13	0.24	5.8	4	104	60	0.82	16	3.1
727	Female	19	Single	Student	28	36	127	58	41	0.41	0.87	7	4.1	127	158	0.9	30	5.2
728	Female	19	Single	Student	28	36	127	58	41	0.41	0.87	7	4.1	127	158	0.9	30	5.2
729	Male	21	Single	Student	8	25	114	52	8	0.31	0.55	6.2	4.4	135	67	0.76	13	4.2
730	Female	21	Single	Student	4	38	105	61	9	0.29	0.53	6.6	4.2	141	45	0.72	15	3.8
731	Male	32	Married	Merchant	17	24	317	81	21	0.34	0.51	7.2	5.2	81	41	0.88	27	5.9
732	Female	19	Single	Student	41	40	165	60	42	0.48	1.19	7.4	4.5	174	159	0.81	20	5.3
733	Male	20	Single	Student	12	27	147	65	24	0.7	1.48	5.9	4	106	121	0.88	21	4.9
734	Female	23	Single	Student	12	34	157	103	8	0.23	0.41	6.3	3.8	160	108	0.63	28	4.2
735	Female	19	Single	Student	6	18	149	56	16	0.16	0.19	6.6	4.2	117	49	0.74	15	5
736	Female	19	Single	Student	11	28	101	37	16	0.28	0.25	6.6	4.2	103	81	1	21	1.8
737	Male	19	Single	Student	5	15	0	111	14	0.26	0.53	6.4	4.6	162	65	1.15	19	6.9
738	Male	27	Single	Student	21	24	167	35	39	0.43	0.6	6.4	4	151	180	0.39	25	6.9
739	Male	20	Single	Student	54	52	188	92	19.1	0.19	0.35	6.6	3.6	194	197	0.89	19	6.9
740	Male	22	Single	Student	17	34	178	66	21	0.21	0.31	6.5	4.4	130	151	0.65	26	4.8
741	Female	19	Single	Student	21	23	204	34	26	0.12	0.19	6.3	3.6	110	96	0.65	19	3.4
742	Male	19	Single	Student	17	30	205	114	32	0.23	0.4	6.2	4.3	75	65	0.89	40	4.8
743	Male	22	Single	Student	7	21	0	67	13	0.17	0.24	6.3	4.4	137	64	0.74	17	3.7
744	Male	22	Single	Student	13	16	0	35	8	0.1	0.24	6	3.6	140	187	0.2	26	3.4
745	Female	21	Single	Student	8	15	0	77	11	0.21	0.34	6.2	4.3	161	59	0.69	18	2.6
746	Female	21	Single	Student	9	20	0	74	11	0.08	0.19	7	4.5	121	58	0.43	11	3.7
747	Male	24	Single	Student	4	24	170	74	11	0.46	0.83	7.3	4.5	122	85	0.63	17	2.4
748	Female	21	Single	Student	34	25	208	33	24	0.16	0.19	6.2	3.7	109	97	0.65	19	3.5
749	Female	18	Single	Student	6	22	188	96	9	0.19	0.28	6.6	4.5	163	67	0.52	20	3.5
750	Female	23	Single	Student	23	32	127	67	18	0.35	0.6	6.5	4.3	137	71	1.08	47	5.3
751	Female	19	Single	Student	10	28	194	36	15	0.26	0.43	7.4	5	121	40	0.94	28	5.5
752	Female	19	Single	Student	5	21	0	44	29	0.12	0.17	5.3	3.9	101	37	0.88	21	3.1
753	Male	20	Single	Student	6	19	103	66	7	0.2	0.33	6.1	4.2	119	31	1.01	23	3.3
754	Male	19	Single	Student	6	29	78	53	11	0.1	0.22	6	4.3	138	59	0.74	10	4.1
755	Female	21	Single	Student	12	24	175	61	17	0.14	0.22	5.9	4	161	86	0.78	17	3.8
756	Male	20	Single	Student	5	22	120	45	16	0.14	0.2	6.8	3.6	126	76	1.03	20	4.9
757	Male	21	Single	Student	7	27	120	79	18	0.06	0.19	7	4.3	140	120	0.64	17	4.8
758	Female	22	Single	Student	15	51	163	60	22	0.21	0.31	6.1	4.3	127	145	0.7	25	4.6
759	Female	21	Single	Student	7	14	126	48	9	0.25	0.5	6.8	4.7	98	59	0.91	26	3.6
760	Female	18	Single	Student	11	20	0	92	14	0.17	0.25	7.1	4.7	138	194	0.88	13	4.3
761	Male	21	Single	Student	7	27	157	39	14	0.52	1.38	6.6	4.4	94	74	0.95	30	5.1
762	Male	19	Single	Student	9	25	0	85	15	0.18	0.28	7	4.2	71	73	0.73	19	5
763	Female	19	Single	Student	4	16	0	52	8	0.13	0.27	6.6	4.1	142	73	0.79	23	3.4
764	Female	23	Single	Student	5	25	87	50	10	0.12	0.22	6	4.1	140	70	0.66	12	3.9
765	Female	20	Single	Student	39	32	95	52	51	0.15	0.23	6.9	3.9	129	54	0.19	17	3.1
766	Female	20	Single	Student	33	30	0	78	26	0.3	0.42	6.6	4.3	178	150	1.28	33	5
767	Female	19	Single	Student	3	22	0	81	9	0.17	0.26	6.1	4.5	155	50	0.66	20	2.6
768	Female	21	Single	Student	26	38	0	48	21	0.19	0.38	6.7	4.2	97	43	0.76	16	4.2
769	Female	19	Single	Student	32	32	0	72	26	0	0.43	6.5	4.3	178	112	0.68	27	5
770	Female	23	Single	Student	37	30	0	72	26	0	0.45	6.4	4.3	166	102	0.57	34	5
771	Female	20	Single	Student	31	39	0	46	20	0.25	0.38	6.8	4.2	97	43	0.75	16	4.1
772	Male	21	Single	Student	11	18	111	75	11	0.14	0.31	6.9	4.6	129	91	0.83	15	5.4
773	Female	19	Single	Student	8	19	0	57	9	0.17	0.27	6.6	3.9	109	40	0.79	32	3
774	Male	26	Single	Student	29	51	139	49	10	0.12	0.2	6.7	4.1	127	75	1.45	33	4.5
775	Female	20	Single	Student	9	22	109	57	11	0.16	0.24	6.5	4.3	111	47	0.71	19	3
776	Male	20	Single	Student	7	23	0	61	12	0.18	0.24	6.8	4.3	163	76	0.82	22	3.8
777	Male	20	Single	Student	6	19	146	79	9	0.11	0.21	6.5	4.2	117	32	0.89	21	3.3
778	Male	18	Single	Student	12	28	0	85	11	0.19	0.24	7.3	4.8	117	85	0.96	20	3.4
779	Female	19	Single	Student	4	19	0	71	11	0.15	0.19	6.8	4.6	116	50	0.65	22	3.5
780	Male	19	Single	Student	11	28	0	60	10	0.14	0.25	6.8	4.3	169	85	0.64	12	3.7
781	Female	22	Single	Student	3	29	176	36	12	0.14	0.23	6.7	4.2	109	170	0.3	21	6.2
782	Female	18	Single	Student	5	26	0	87	16	0.35	0.53	6.4	4.6	80	60	0.66	24	4.3
783	Female	19	Single	Student	16	28	0	73	26	0.16	0.44	6.6	4.3	178	116	0.66	31	5.2
784	Female	23	Single	Student	10	23	49	28	11	0.14	0.22	6	4.1	85	29	0.76	12	3.4
785	Male	21	Single	Student	4	21	0	69	9	0.19	0.25	6.1	4.3	150	55	0.66	18	2.6
786	Female	23	Single	Student	21	22	187	34	24	0.1	0.19	6.1	3.6	99	79	0.66	13	3.3
787	Male	29	Single	Merchant	7	22	111	43	13	0.22	0.34	6.6	4.6	112	55	0.81	32	4.7
788	Male	23	Single	Student	40	48	109	53	23	0.24	0.28	6.8	3.4	169	89	0.81	20	4.7
789	Female	22	Single	Student	34	39	156	44	9	0.14	0.18	6.2	4	120	36	0.8	19	3.6
790	Female	20	Single	Student	6	32	0	88	11	0.11	0.36	6.1	4.2	115	41	0.98	19	4.1
791	Male	19	Single	Student	8	21	0	85	12	0.14	0.39	6.8	4.7	110	54	0.98	22	5
792	Male	29	Single	Daily laborer	7	29	164	87	17	0.16	0.25	6.6	4.6	105	24	0.77	24	3.3
793	Female	23	Single	Student	17	38	115	91	15	0.26	0.53	7.5	4.8	120	71	1	23	6.8
794	Male	30	Married	Employed	25	41	13	37	28	0.3	0.39	5.6	4	121	56	1.11	23	5.3
795	Female	21	Single	Student	2	16	90	47	12	0.16	0.24	6.5	4.2	146	50	0.53	14	3.3
796	Male	21	Single	Student	10	18	132	63	9	0.16	0.17	6.2	4.3	123	57	0.67	21	3.4
797	Female	21	Single	Student	6	34	172	93	10	0.15	0.29	6.3	4.4	157	64	0.69	30	3.3
798	Male	21	Single	Student	14	39	0	47	20	0.19	0.4	6.5	4.1	95	40	0.86	24	4
799	Female	21	Single	Student	5	18	127	59	10	0.23	0.44	5.9	4.2	96	40	0.81	22	3.8
800	Female	20	Single	Student	5	23	0	67	10	0.21	0.28	6.6	3.9	114	39	0.83	31	3.2
801	Male	22	Single	Student	8	33	200	82	7	0.39	0.58	6.6	4.4	57	29	0.86	27	4.8
802	Male	27	Married	Merchant	29	55	173	91	53	0.36	0.51	7	4.7	136	44	1.39	23	4.3
803	Female	21	Single	Student	4	20	106	67	10	0.26	0.49	6.3	4.3	130	41	0.73	11	3
804	Female	18	Single	Student	5	29	160	50	6	0.12	0.26	6.4	4.1	136	70	0.68	30	3.1
805	Male	23	Single	Student	45	51	156	89	34	0.2	0.32	5.8	3.6	142	123	0.97	25	5.8
806	Female	20	Single	Student	10	28	0	104	25	0.11	0.23	6.9	4.1	175	91	0.67	19	4.1
807	Male	26	Single	Student	10	24	76	55	27	0.32	0.44	7.1	4.5	175	84	0.73	26	4.8
808	Male	20	Single	Student	11	38	158	59	18	0.13	0.23	5.7	3.6	166	88	0.69	18	3.6
809	Female	19	Single	Student	14	20	0	86	14	0.2	0.28	6.9	4.2	68	153	0.64	22	5.5
810	Male	22	Single	Student	4	22	0	89	14	0.12	0.4	5.9	4.3	117	40	1.01	21	3.5
811	Female	20	Single	Student	8	18	0	69	9	0.19	0.25	5.9	3.9	107	39	0.77	29	2.8
812	Female	20	Single	Student	6	22	0	74	9	0.14	0.25	5.8	4	147	52	0.56	19	2.5
813	Female	19	Single	Student	6	25	143	55	10	0.2	0.35	6.5	4.4	148	58	0.7	18	2.8
814	Female	18	Single	Student	12	18	114	74	8	0.12	0.3	6.5	4	89	68	0.75	22	2.7
815	Female	20	Single	Student	7	20	162	54	7	0.16	0.28	6.8	4.2	140	65	0.81	18	3.3
816	Female	23	Single	Student	6	35	68	67	22	0.32	0.59	6.6	4.5	119	50	0.78	14	4.1
817	Male	22	Single	Student	29	60	101	69	22	0.24	0.46	6.9	4.1	94	110	0.98	30	5.2
818	Male	24	Single	Student	28	26	175	28	44	0.13	1.28	5.9	4.1	104	80	0.46	42	3
819	Male	20	Single	Student	11	33	87	36	14	0.13	0.9	5.2	3.5	127	35	0.84	18	3.2
820	Male	20	Single	Student	4	27	87	48	14	0.12	0.21	5.9	3.9	106	69	0.86	20	4.6
821	Male	22	Single	Student	8	14	98	49	12	0.14	0.23	6.8	4.9	124	57	0.83	20	4.3
822	Female	19	Single	Student	11	36	89	37	13	0.14	0.24	5.9	4.4	85	41	0.68	22	1.9
823	Female	23	Married	Private worker	13	23	152	68	12	0.09	0.21	7.1	4.6	157	94	0.88	19	4
824	Male	19	Single	Student	13	25	171	56	14	0.24	0.37	6.4	4.5	114	35	0.75	27	4.9
825	Male	22	Single	Student	13	30	133	80	27	0.29	0.41	6.6	4.5	177	78	0.94	17	4.8
826	Female	19	Single	Student	6	24	0	88	15	0.16	0.43	5.9	4.2	116	38	0.94	18	3.7
827	Female	19	Single	Student	6	25	143	68	11	0.18	0.3	6.2	4.3	98	42	0.8	15	3.4
828	Male	19	Single	Student	6	19	74	41	6	0.15	0.23	4.4	3	84	37	0.58	19	2.8
829	Female	19	Single	Student	7	25	93	69	11	0.18	0.29	6.3	4.2	149	51	0.71	15	4.1
830	Male	19	Single	Student	4	22	0	90	15	0.14	0.42	5.9	4.3	119	38	0.96	27	3.8
831	Female	19	Single	Student	6	17	0	73	9	0.17	0.27	5.9	4	107	38	0.67	28	2.8
832	Male	20	Single	Student	7	24	101	27	11	0.45	0.74	5	3.4	61	41	0.98	27	4.6
833	Female	23	Single	Student	8	37	139	81	16	0.28	0.48	6.7	4.6	118	124	1.01	18	4.7
834	Male	20	Single	Student	5	25	0	60	10	0.15	0.27	6.6	4.4	145	40	0.8	22	2.4
835	Male	29	Single	Employed	22	43	182	49	35	0.29	0.46	7.5	4.8	136	73	0.81	28	5.6
836	Female	22	Single	Student	40	25	0	47	21	0.1	0.22	6.6	3.8	161	71	0.8	17	4.8
837	Female	23	Single	Student	18	34	143	55	11	0.19	0.2	6.6	4.2	120	50	0.85	25	4.2
838	Male	21	Single	Student	8	42	202	82	32	0.32	0.61	7.4	5	148	68	0.98	27	5.7
839	Male	25	Single	Student	12	26	169	93	13	0.16	0.22	7.2	4.6	101	103	0.85	35	4.3
840	Female	19	Single	Student	13	23	0	65	15	0.16	0.39	6.8	3.5	136	183	0.29	22	4.5
841	Female	21	Single	Student	7	34	133	43	11	0.21	0.31	6	4.2	111	62	0.65	14	3.1
842	Male	23	Single	Student	7	18	95	63	19	0.31	0.56	6.1	4.3	105	32	1.01	13	4.8
843	Female	23	Single	Student	12	32	109	29	11	0.21	0.29	5.3	3.6	121	54	0.76	22	2.9
844	Female	18	Single	Student	9	51	192	53	11	0.19	0.36	6.6	4.2	123	87	0.75	17	3.3
845	Male	20	Single	Student	18	30	219	62	7	0.2	0.29	5.8	3.6	79	35	0.76	19	3.2
846	Female	21	Single	Student	4	37	162	73	11	0.45	0.85	6.9	4.6	121	84	0.59	14	2.3
847	Male	28	Single	Employed	32	41	98	45	34	0.22	0.6	7.9	4.8	203	138	0.75	29	6.8
848	Male	20	Single	Student	6	13	0	72	10	0.25	0.45	6.3	4.5	131	35	0.76	20	3.1
849	Male	20	Single	Student	6	21	145	79	15	0.26	0.36	5.6	3.8	82	46	1.12	18	4.7
850	Female	21	Single	Student	9	34	111	52	12	0.26	0.29	5.5	4.1	99	47	0.69	10	3.3
851	Male	20	Single	Student	3	18	0	71	11	0.25	0.47	6.5	4.5	136	37	0.65	12	3.1
852	Male	25	Single	Student	7	15	117	35	9	0.16	0.25	6.4	4.4	145	69	0.78	23	3.8
853	Male	21	Single	Student	6	20	71	43	8	0.11	0.17	5	3.5	79	34	0.64	20	2.9
854	Male	20	Single	Student	12	30	156	88	11	0.14	0.2	6.1	4.4	139	47	0.92	25	3.8
855	Male	19	Single	Student	5	24	0	86	15	0.32	0.51	6.3	4.6	77	49	0.76	18	4.4
856	Male	19	Single	Student	7	28	164	49	10	0.18	0.27	6.3	4.2	116	92	0.72	19	3.3
857	Male	23	Single	Student	29	35	142	31	38	0.38	0.68	5.9	4.1	135	139	0.74	22	6.3
858	Female	21	Single	Student	12	21	148	52	15	0.21	0.32	6.9	4.3	79	43	0.95	26	5.9
859	Female	22	Single	Student	6	24	0	88	14	0.17	0.44	6.1	4.3	118	38	0.96	27	3.8
860	Male	29	Single	Student	27	38	276	121	79	0.35	0.57	6.2	4	112	48	0.86	20	4.4
861	Female	23	Single	Student	11	26	0	86	15	0.33	0.52	6.7	4.5	74	50	0.77	25	4.2
862	Male	20	Single	Student	6	29	0	61	17	0.22	0.28	6.7	4.4	173	27	0.49	14	4
863	Male	22	Single	Student	18	27	194	107	31	0.24	0.38	6	4.3	79	61	0.95	41	4.7
864	Male	22	Single	Student	27	32	99	52	13	0.2	0.42	6.7	4.8	143	156	0.68	26	4.1
865	Male	23	Single	Student	18	45	95	60	26	0.08	0.47	5.6	3.7	107	60	0.68	14	3.4
866	Female	19	Single	Student	7	22	190	78	6	0.38	0.54	6.1	4.2	54	26	0.92	21	4.8
867	Male	26	Single	Student	18	33	175	90	8	0.41	0.95	5.7	4	104	59	0.79	17	4.6
868	Male	20	Single	Student	20	45	111	85	3	0.47	0.5	7.1	4.6	136	110	0.55	21	6.7
869	Female	20	Single	Student	11	46	133	56	13	0.19	0.3	6.3	4.1	87	38	0.83	18	3.9
870	Male	18	Single	Employed	26	20	102	41	15	0.08	0.39	5.9	3.9	110	56	1.16	15	3.5
871	Male	21	Single	Student	16	31	145	55	18	0.27	0.36	7.4	4.5	93	62	0.92	23	5.9
872	Male	23	Single	Student	4	16	168	66	11	0.13	0.3	6.2	4.4	105	62	0.82	17	3.5
873	Female	37	Married	Employed	12	23	151	156	37	0	0.8	8	5.4	162	97	1.29	32	5.9
874	Male	28	Married	Employed	28	30	186	167	11.6	0	0.06	8.6	5.6	137	199	1.36	21	7
875	Female	23	Single	Merchant	7	11	222	102	14	0.1	0.13	8.4	5.3	128	46	0.82	25	3.5
876	Female	18	Single	Merchant	13	17	216	186	15	0.09	0.07	8.6	5.6	136	111	0.55	19	3.2
877	Male	26	Single	Employed	35	30	201	163	18.5	0.15	0.15	9.8	6.4	187	105	0.99	32	6.2
878	Male	49	Married	Employed	50	57	166	92	50	0.33	0.33	8.1	5.9	150	74	0.52	29	4.2
879	Male	29	Single	Employed	9	21	124	224	14	0.14	0.16	7.8	5.2	162	54	0.89	27	3.8
880	Male	26	Married	Employed	34	50	215	163	96	0.11	0.08	8.5	5.5	140	91	1.13	45	6.6
881	Male	57	Married	Employed	22	31	260	184	12	0.13	0.13	8.1	4.9	102	66	1.07	25	5.7
882	Female	19	Single	Employed	14	18	157	106	12	0.09	0.13	8.4	5.5	144	141	0.66	28	2.9
883	Female	23	Single	Employed	62	49	133	48	16	0.24	0.11	8.8	6.1	172	72	0.57	34	6.6
884	Male	33	Married	Employed	13	20	156	147	23	0.04	0.14	8.8	5.1	153	57	1.09	46	5
885	Male	37	Married	Employed	20	43	31	222	16	0.18	0.07	7.9	5.9	145	198	1.32	26	4.6
886	Male	28	Married	Employed	30	35	207	131	14	0.07	0.12	9.3	6	119	94	0.82	24	5.7
887	Female	30	Married	Merchant	14	23	152	212	15	0.11	0.1	7.8	5.5	121	69	1.23	37	6.8
888	Male	28	Married	Merchant	32	32	160	204	46	0.17	0.17	8.9	5.6	212	199	0.99	18	6.9
889	Male	25	Single	Merchant	16	24	242	192	17	0.26	0.52	8.7	5.5	155	119	0.76	14	4.1
890	Male	30	Married	Merchant	53	37	266	235	45	0.1	0.23	8.1	5	218	194	0.8	26	5.3
891	Female	28	Married	Merchant	31	31	254	124	15	0.19	0.12	8.4	6.1	178	80	0.94	42	6.5
892	Male	38	Married	Merchant	13	25	408	196	18	0.13	0.22	9.2	5.6	104	113	0.91	26	4
893	Female	23	Single	Merchant	11	20	187	178	13	0.17	0.23	8.1	5.2	137	58	0.93	28	4.5
894	Male	38	Married	Merchant	18	23	154	152	36	0.38	0.78	8.9	6	163	217	0.81	32	5.6
895	Female	31	Married	Merchant	13	22	113	175	10	0.06	0.08	8.2	4.9	149	43	0.96	24	2.5
896	Female	30	Married	Merchant	49	64	189	234	64	0.25	0.14	9.5	6.2	235	230	0.39	24	6.8
897	Female	50	Married	Merchant	8	12	149	107	11	0.08	0.08	8.1	5.2	131	57	0.9	31	4.2
898	Male	24	Single	Merchant	17	31	198	105	14	0.07	0.11	7.2	5.1	110	46	0.92	36	4
899	Male	24	Single	Merchant	19	56	116	113	20	0.18	0.38	8.2	5.3	111	117	1	33	3.4
900	Male	33	Married	Merchant	18	25	155	228	18	0.1	0.16	7.4	4.7	122	150	0.85	29	3.4
901	Female	40	Married	Merchant	37	36	335	159	29	0.13	0.12	8.4	5.7	182	185	0.7	25	5.3
902	Male	26	Single	Merchant	10	25	154	296	18	0.13	0.21	7.2	4.7	97	26	0.94	22	3.7
903	Female	28	Married	Merchant	12	22	307	192	25	0.1	0.1	8.6	5.6	97	86	1.05	29	3.6
904	Male	24	Single	Merchant	24	22	130	169	22	0.21	0.26	8.4	5	148	125	0.93	35	6
905	Female	28	Married	Merchant	46	50	64	150	36	0.07	0.1	7.5	4.9	102	43	1.26	30	3.7
906	Female	25	Single	Employed	10	17	139	124	11	0.04	0.15	8	5.2	158	81	0.85	22	3.1
907	Female	29	Single	Employed	12	19	207	219	24	0.01	0.15	8.9	5.3	185	125	0.81	35	4.7
908	Male	25	Single	Employed	28	12	159	156	18	0.27	0.27	8.6	5.4	160	179	0.47	23	5.5
909	Male	25	Married	Employed	26	32	136	137	34	0.15	0.21	7.8	5.1	149	59	1	33	2.8
910	Female	20	Single	Student	19	23	34	184	19	0.02	0.08	7.3	4.8	90	35	1.36	25	2.1
911	Male	26	Single	Employed	58	37	20	142	2	0.06	0.07	6.5	4.4	102	101	0.27	24	4.7
912	Male	22	Single	Employed	34	27	30	87	20	0.07	0.09	6.8	4.7	67	64	1.46	30	2.5
913	Male	27	Married	Merchant	6	16	151	159	8	0.18	0.26	7.8	5.1	141	63	0.76	24	3.1
914	Female	24	Single	Student	35	35	286	112	76	0.19	0.2	9.2	6.1	168	241	1.17	50	7.3
915	Male	21	Single	Student	35	43	18	152	36	0.06	0.08	6.8	4.3	99	54	0.85	18	3.1
916	Female	23	Single	Daily laborer	59	25	128	225	19	0.01	0.22	8.8	5.8	163	102	1.28	23	4.9
917	Female	18	Single	Student	25	29	176	205	25	0	0.11	9.2	5.8	146	132	1	29	3.9
918	Female	18	Single	Student	11	18	151	149	16	0.19	0.32	8.8	6	160	135	0.77	25	4.4
919	Male	21	Single	Student	20	28	118	177	15	0.1	0.13	7.9	5	69	29	0.85	38	3.8
920	Male	34	Single	Merchant	28	35	175	129	30	0.79	1.79	8.3	5.9	144	94	1.08	14	3.2
921	Male	26	Single	Merchant	14	22	247	90	23	0.24	0.39	8.5	5.6	176	98	0.77	26	3.6
922	Male	42	Married	Merchant	12	22	163	151	18	0.4	0.59	7	4.6	137	98	1	28	3.8
923	Male	28	Married	Merchant	21	25	201	132	21	0.36	0.56	9.3	5.9	149	162	1.07	16	9.3
924	Male	21	Single	Merchant	11	25	208	140	21	0.21	0.36	8.9	5.7	114	93	0.87	33	6.2
925	Male	22	Single	Student	12	39	202	156	41	0.51	0.71	8.9	5.2	107	67	0.92	30	3.9
926	Male	25	Single	Merchant	16	31	100	151	53	0.78	1.78	7.9	5.5	110	135	0.94	19	3.6
927	Female	20	Single	Student	10	17	181	106	24	0.15	0.18	7.7	5.1	120	82	0.79	18	4.4
928	Male	20	Single	Student	17	28	249	175	24	0.07	0.19	8	5.1	116	68	0.99	31	3.2
929	Female	19	Single	Student	7	18	163	103	11	0.53	1.04	8.6	5.8	159	67	0.88	37	3.6
930	Female	20	Single	Student	10	18	284	103	17	0.1	0.2	8.3	5.3	182	114	0.74	13	3.6
931	Female	18	Single	Student	12	23	149	153	13	0.15	0.2	8.3	5.2	174	192	0.75	20	3.6
932	Female	19	Single	Student	28	12	159	156	18	0.17	0.17	8.6	5.4	160	179	0.47	23	5.5
933	Female	18	Single	Student	8	15	177	115	20	0.25	0.39	8.3	5.4	151	100	0.67	23	4
934	Male	21	Single	Student	13	18	195	254	13	0.29	0.44	8.3	5.3	101	57	0.95	43	4.4
935	Male	23	Single	Student	31	21	170	166	31	0.14	0.22	9.6	6.1	168	136	0.35	13	3.2
936	Female	21	Single	Student	11	17	182	158	14	0.09	0.17	8.2	5.6	143	70	0.9	23	4.1
937	Female	21	Single	Student	10	15	203	211	15	0.07	0.23	8.2	5.2	115	74	0.75	22	3.5
938	Male	21	Single	Student	9	30	125	168	13	0.35	0.48	8.1	5.8	166	72	1.03	34	5.2
939	Male	21	Single	Student	21	23	197	322	47	0.17	0.22	9	5.7	149	97	1.12	28	6.5
940	Male	20	Single	Student	23	23	252	172	17	0.18	0.27	9.1	6	121	98	0.23	18	5.4
941	Female	21	Single	Student	13	33	247	134	22	0.12	0.14	8.7	5.5	186	148	0.65	27	4.7
942	Female	21	Single	Student	12	16	146	162	11	0.12	0.19	7.9	5.4	138	115	0.84	21	3.7
943	Female	20	Single	Student	18	34	181	223	35	0.11	0.21	8.7	5.6	120	72	0.97	35	4.8
944	Male	46	Married	Merchant	15	19	155	236	56	0.34	0.45	8.7	5.7	224	187	0.86	24	5.7
945	Male	21	Single	Student	19	27	122	228	16	0.05	0.19	8.8	5.4	170	100	0.89	29	3.8
946	Male	22	Single	Student	11	24	140	204	12	0.32	0.49	8	5.2	126	66	0.9	24	4
947	Male	25	Married	Farmer	15	24	171	201	16	0.39	0.42	8.3	5.3	87	100	0.58	24	2.9
948	Male	32	Married	Employed	17	25	144	126	29	0.18	0.23	7.9	5.5	196	240	0.52	15	4.4
949	Male	34	Married	Employed	16	23	198	125	7	0.56	0.77	7.5	5.2	145	94	1.05	27	3.3
950	Male	28	Married	Employed	18	15	132	241	14	0.29	0.35	7.8	5.5	123	167	0.95	34	4.8
951	Male	36	Married	Employed	12	15	138	141	25	0.42	0.49	8.3	5.7	216	182	0.88	35	4.8
952	Male	24	Single	Employed	12	20	129	258	19	0.85	1.5	8.1	5.5	150	48	0.97	26	4.5
953	Male	22	Single	Employed	31	28	148	124	53	0.23	0.23	8.4	6.2	190	224	0.78	28	4.1
954	Male	24	Single	Employed	14	24	122	229	19	0.25	0.31	8.4	5	171	132	0.89	22	2.7
955	Male	31	Married	Employed	14	21	97	187	17	0.41	0.62	8.3	5.5	144	156	0.87	35	3.2
956	Male	30	Married	Employed	28	31	152	161	12	0.2	0.2	8.9	6	181	93	0.28	19	3.3
957	Male	26	Single	Employed	20	20	146	91	22	0.61	1.18	8.1	5.4	170	110	1.06	36	4.7
958	Male	21	Single	Employed	15	21	180	159	20	0.17	0.29	8.7	6	210	98	1.01	40	6.1
959	Female	19	Single	Student	17	27	153	227	12	0.24	0.28	8	5.1	126	76	0.75	23	3.7
960	Male	18	Married	Student	15	29	295	144	13	0.28	0.33	7.4	5.5	87	37	0.85	20	3.9
961	Male	19	Single	Student	21	18	153	149	24	0.21	0.33	9.6	6.3	213	241	1.01	44	4.2
962	Male	28	Married	Student	28	34	140	158	30	0.31	0.37	8.3	5.6	158	222	0.9	29	4.7
963	Male	19	Single	Student	24	26	381	240	17	0.12	0.22	8.9	6	164	209	0.72	31	4
964	Male	19	Single	Student	15	30	334	136	17	0.47	0.6	8.8	5.8	108	124	0.62	28	4.5
965	Male	22	Single	Student	16	20	188	251	18	0.25	0.29	7.2	4.9	89	43	0.97	36	2.7
966	Male	25	Single	Student	33	40	227	227	25	0.12	0.28	9.9	4.9	74	85	0.75	29	5.6
967	Male	18	Single	Student	15	29	572	136	14	0.32	0.43	7.9	5.5	94	130	0.82	28	3.9
968	Female	18	Single	Student	10	24	123	176	25	0.5	0.69	8.5	5.3	99	46	0.84	29	3.3
969	Female	19	Single	Student	21	32	121	139	13	0.17	0.18	7.3	4.9	109	71	0.63	15	3
970	Female	20	Single	Student	14	32	111	99	18	0.11	0.23	8	5.1	138	86	0.72	23	2.9
971	Male	34	Single	Merchant	21	32	172	102	39	0.26	0.3	8	5.4	171	97	0.98	21	5.1
972	Female	30	Single	Student	19	22	138	160	9	0.19	0.21	8	5	173	103	0.75	22	3.1
973	Female	19	Single	Student	26	30	149	112	13	0.13	0.64	9	6.1	208	172	0.77	19	3.6
974	Male	19	Single	Student	19	20	127	164	18	0.42	0.47	7.9	5.3	108	107	0.81	22	5
975	Female	21	Single	Student	14	48	136	66	12	0.08	0.08	10.1	6.6	176	180	0.61	26	4.7
976	Female	18	Single	Student	6	16	178	113	14	0.12	0.22	9	5.8	137	73	0.84	17	3.7
977	Female	20	Single	Student	14	48	136	66	12	0.2	0.2	10.1	6.6	176	180	0.61	26	4.7
978	Male	31	Single	Employed	11	23	138	191	28	0.36	0.55	9	5.9	166	155	0.83	41	6.4
979	Male	30	Married	Employed	23	22	73	195	16	0.13	0.1	8.2	4.9	163	105	1.03	26	3.8
980	Male	26	Single	Employed	28	51	191	109	43	0.27	0.33	8.4	5.6	142	101	0.91	36	6.1
981	Female	21	Single	Employed	15	29	141	110	11	0.47	0.59	8.1	5.7	158	75	0.88	26	3.2
982	Male	27	Single	Employed	22	32	92	198	34	0.27	0.34	7.7	5	154	138	0.87	22	3.8
983	Male	24	Single	Employed	16	27	126	186	15	0.25	0.26	8.3	5.7	118	117	0.98	17	6.2
984	Male	21	Single	Employed	15	31	161	162	21	0.22	0.29	8.6	5.6	122	91	0.74	34	3.9
985	Male	34	Married	Employed	38	31	123	170	76	0.37	0.37	8	5.6	150	98	0.81	27	6.1
986	Male	22	Single	Employed	14	27	202	233	15	0.3	0.36	7.3	5.1	111	65	0.94	23	4.6
987	Male	21	Single	Employed	14	29	163	135	15	0.24	0.31	7.5	4.9	125	73	0.93	28	4.2
988	Male	26	Single	Student	39	34	266	288	42	0.26	0.3	9.2	6.3	190	236	0.97	22	5.2
989	Male	25	Single	Student	54	33	138	204	41	0.27	0.27	9.9	6.7	195	90	0.83	43	4.5
990	Female	22	Single	Student	12	22	166	174	21	0.67	0.92	7.7	5.3	113	57	0.83	24	3.2
991	Female	21	Single	Student	18	23	155	348	15	0.16	0.17	7.8	4.8	119	151	0.67	26	2.1
992	Female	21	Single	Student	21	31	262	156	18	0.19	0.19	9.6	6.2	210	215	0.77	26	3.5
993	Male	21	Single	Student	31	39	409	168	23	0.17	0.2	9.2	6.1	139	195	0.95	34	5.5
994	Female	20	Single	Student	13	37	241	149	23	0.2	0.21	8.5	5.4	168	99	0.77	28	4.1
995	Female	21	Single	Student	27	38	213	139	21	0.24	0.23	8	6.3	162	151	0.66	20	3.1
996	Female	29	Single	Student	13	19	203	141	17	0.12	0.15	9.5	6.2	168	126	0.86	30	4
997	Female	18	Single	Student	28	28	228	94	32	0.08	0.14	9.2	6	190	203	0.51	18	4.6
998	Female	22	Single	Student	8	18	157	142	12	0.15	0.19	7.1	4.9	121	167	0.82	24	2.7
999	Male	25	Single	Student	22	26	174	171	19	0.24	0.28	7.9	5.3	114	63	1.14	26	4.4
1000	Male	23	Single	Student	28	35	184	151	29	0.38	0.51	9.5	6.4	148	68	0.78	32	5.5
1001	Male	20	Single	Student	13	26	153	276	26	0.69	1.01	7.2	4.9	132	59	1.02	29	4.5
1002	Male	22	Single	Student	16	26	254	221	16	0.44	0.64	8.6	6	130	155	0.86	26	4.8
1003	Male	20	Single	Student	24	34	219	168	45	0.27	0.26	8.3	5.3	110	60	1.03	21	3.7
1004	Male	20	Single	Student	15	23	228	83	20	0.45	0.66	8.5	5.9	123	102	1	44	5
1005	Female	19	Single	Student	19	29	144	98	20	0.12	0.29	7.5	5.3	110	45	1.01	19	4.5
1006	Female	18	Single	Student	9	22	193	170	15	0.27	0.35	8.4	5.3	114	42	0.83	24	3.9
1007	Female	19	Single	Student	22	27	113	182	27	0.24	0.3	7.7	5.1	85	33	0.86	27	2.8
1008	Female	19	Single	Student	12	17	239	258	21	0.12	0.14	8.6	5.5	158	89	0.58	27	3
1009	Female	19	Single	Student	17	36	228	187	31	0.11	0.29	10.7	6.3	127	76	0.82	31	4.8
1010	Female	20	Single	Student	22	20	260	180	27	0.19	0.2	7.6	5	128	42	0.57	23	4.1
1011	Male	20	Single	Student	17	24	184	224	24	0.27	0.35	8.3	5.7	163	99	1.13	28	4.8
1012	Female	22	Single	Student	13	23	150	69	11	0.12	0.22	6.4	4.4	85	46	0.91	28	2.4
1013	Male	22	Single	Student	6	17	136	182	17	0.3	0.44	9.2	5.3	140	76	1.08	33	5.7
1014	Male	19	Single	Student	23	31	181	141	13	0.37	0.51	8.7	5.6	112	75	0.74	27	4.6
1015	Male	22	Single	Student	19	29	165	173	35	0.35	0.56	9.2	5.9	171	199	0.9	32	6.6
1016	Male	20	Single	Student	16	30	288	269	29	0.47	0.61	8.3	5.6	114	135	0.96	24	4.1
1017	Female	20	Single	Student	15	20	188	167	17	0.09	0.89	8.5	5.5	178	197	0.96	29	3.3
1018	Male	22	Single	Student	15	36	128	303	24	0.24	0.29	7.4	5.2	119	56	0.99	21	2.7
1019	Male	22	Single	Student	12	32	131	150	22	0.13	0.37	8.6	5.4	113	61	1.03	26	4.4
1020	Female	22	Single	Student	10	18	207	166	11	0.22	0.33	7.2	4.8	151	94	0.69	22	3.1
1021	Female	24	Single	Student	7	20	134	169	9	0.17	0.2	7.2	4.8	115	156	0.74	18	3.6
1022	Male	19	Single	Student	6	16	240	109	16	0.37	0.5	8.9	6.2	90	71	0.72	37	4.6
1023	Male	19	Single	Student	11	28	215	151	17	0.65	0.85	7.8	5.2	84	38	0.96	27	3.9
1024	Female	22	Single	Student	7	19	191	121	16	0.3	0.4	7.5	4.9	123	60	0.82	29	3.1
1025	Male	21	Single	Student	24	35	193	191	27	0.42	0.53	7.6	5.3	130	122	0.86	23	4.2
1026	Female	19	Single	Student	12	21	151	132	8	0.21	0.21	8	4.9	112	38	0.74	11	3.1
1027	Female	19	Single	Student	17	23	103	174	31	0.07	0.14	9.4	6.2	140	158	1.13	28	7.3
1028	Female	19	Single	Student	6	15	129	217	15	0.16	0.22	8.1	5.6	153	55	0.81	12	3.4
1029	Female	21	Single	Student	14	21	151	128	19	0.14	0.23	7.9	5.3	124	69	0.69	25	2.4
1030	Female	20	Single	Student	14	25	209	119	16	0.28	0.28	7.6	4.9	116	34	0.79	17	4.3
1031	Female	20	Single	Student	9	18	151	136	9	0.14	0.16	7.2	5	108	50	0.83	22	3.5
1032	Female	20	Single	Student	9	18	200	167	12	0.29	0.46	8.8	5.6	88	130	0.82	31	4.4
1033	Female	24	Single	Student	11	23	166	112	17	0.37	0.42	7.1	4.6	106	37	0.79	14	3
1034	Male	29	Married	Student	15	28	150	111	20	0.31	0.44	7.5	5.1	141	84	0.92	26	4.6
1035	Male	29	Married	Student	24	24	214	128	10	0.18	0.26	7	4.8	183	78	1.08	36	3.2
1036	Male	19	Single	Student	20	28	420	207	16	0.39	0.82	8.1	5.8	103	146	0.91	23	3.7
1037	Male	19	Single	Student	8	44	442	138	23	0.19	0.51	9.1	6	129	60	0.92	34	4.8
1038	Female	21	Single	Student	18	29	188	169	16	0.22	0.28	7.9	5.4	161	78	0.78	29	3.8
1039	Male	18	Single	Student	15	30	248	145	14	0.28	0.37	6.5	4.9	76	51	0.95	33	5.4
1040	Male	22	Single	Student	15	24	411	136	21	0.31	0.45	8.7	5.8	133	193	0.81	30	5.9
1041	Male	21	Single	Student	23	24	176	271	33	0.15	0.15	8.7	5.8	187	213	1.17	43	10
1042	Male	20	Single	Student	29	35	436	147	9	0.18	0.5	8.5	5.8	115	113	0.7	25	4
1043	Male	28	Married	Merchant	43	47	178	229	21.1	0.68	0.68	9.1	5.5	137	68	0.7	33	5.2
1044	Female	27	Married	Employed	13	22	116	144	12	0.22	0.25	8.3	5.7	58	59	0.91	27	2.9
1045	Male	28	Married	Employed	20	26	138	185	25	0.33	0.38	8.5	5.5	115	95	1.18	35	4.7
1046	Female	20	Single	Employed	10	18	207	159	12	0.12	0.15	7.5	5	173	78	0.9	25	3
1047	Female	21	Single	Student	14	21	155	141	12	0.13	0.16	8.3	5.4	154	85	0.83	24	3.3
1048	Male	20	Single	Merchant	18	29	308	151	23	0.17	0.17	9.6	5.9	128	69	0.63	23	3.2
1049	Male	28	Single	Employed	19	30	290	157	24	0.27	0.27	8.4	6.1	127	177	0.78	28	6.8
1050	Female	22	Single	Student	10	18	130	168	15	0.13	0.13	8.3	5.2	131	65	0.9	32	4.1
1051	Male	21	Single	Student	7	27	212	172	18	0.14	0.27	8.7	5.3	97	57	1	20	3.8
1052	Male	27	Married	Employed	31	28	148	124	53	0.22	0.22	8.4	6.2	190	224	0.78	28	4.1
1053	Male	22	Single	Student	15	20	165	201	20	0.42	0.58	7.8	5.1	103	69	0.95	34	4.5
1054	Female	21	Single	Student	8	21	157	306	11	0.32	0.51	8.1	5.3	157	51	0.8	23	3.4
1055	Female	22	Single	Student	12	16	178	160	12	0.21	0.28	8.7	5.5	136	58	0.79	18	2.9
1056	Female	21	Single	Employed	10	18	128	154	13	0.14	0.19	8.4	5.3	182	69	0.76	18	3.1
1057	Male	28	Married	Employed	12	21	178	126	15	0.45	0.55	8.6	5.3	166	86	0.99	23	4.7
1058	Male	29	Married	Employed	27	40	133	73	29	0.24	0.25	7.3	5	131	150	1.12	27	5.1
1059	Male	25	Single	Employed	12	20	145	114	27	0.29	0.37	10.1	6.2	160	212	0.82	24	4
1060	Male	29	Married	Employed	21	27	136	289	23	0.23	0.24	8.5	5.6	156	140	1.08	24	5.3
1061	Male	27	Married	Employed	15	22	162	196	29	0.22	0.27	8	5.2	138	91	0.93	16	4.2
1062	Male	26	Single	Employed	16	27	153	236	44	0.19	0.31	8.9	6.1	135	125	1.1	28	5.6
1063	Female	30	Married	Employed	13	19	150	143	13	0.11	0.12	7.4	5.1	155	78	1	32	3.6
1064	Female	40	Married	Employed	24	17	125	86	20	0.17	0.24	7.2	5	149	123	0.94	27	3.8
1065	Female	42	Married	Employed	15	19	190	171	22	0.17	0.19	7.9	5.1	198	160	0.83	25	3.8
1066	Male	27	Married	Merchant	19	28	150	132	23	0.2	0.2	8.6	5.7	193	161	1	14	4.2
1067	Female	26	Married	Employed	23	30	210	184	18	0.19	0.19	8.9	5.6	191	108	0.65	28	5.4
1068	Female	18	Single	Student	17	32	204	148	17	0.26	0.6	9.2	5.9	136	74	0.86	23	3.8
1069	Male	61	Married	Merchant	19	22	163	107	26	0.35	0.35	7.6	4.5	148	82	0.78	23	4
1070	Male	19	Single	Student	9	20	494	180	20	0.21	0.26	8.5	5.6	119	71	0.71	28	4.3
1071	Male	26	Married	Merchant	18	17	183	167	16	0.25	0.29	7.8	4.9	126	99	0.89	23	5.1
1072	Male	20	Single	Student	22	23	196	122	17	0.25	0.37	9.6	5.8	113	115	0.88	25	4.3
1073	Female	19	Single	Student	11	18	140	203	11	0.12	0.25	8.6	5.4	113	66	0.8	25	3.3
1074	Male	35	Married	Employed	30	46	159	88	85	0.4	0.43	8.5	5.9	181	216	1.05	32	7.3
1075	Male	41	Married	Merchant	32	27	126	221	31	0.44	0.51	9.3	6.2	160	100	0.71	34	6.3
1076	Male	27	Single	Merchant	31	21	170	255	47	0.25	0.25	9	6	177	228	0.94	25	7.1
1077	Male	29	Single	Employed	14	23	142	122	28	0.21	0.3	9.3	6.1	202	203	0.85	38	3.8
1078	Male	22	Single	Merchant	12	23	189	134	26	0.36	0.6	8.7	5.9	162	87	0.95	21	5.2
1079	Male	54	Single	Merchant	11	14	176	61	19	0.2	0.26	8.5	5.4	164	161	1.01	33	5.6
1080	Female	42	Married	Merchant	8	16	193	283	17	0.13	0.16	8.4	5.3	211	136	0.71	22	4
1081	Male	30	Married	Employed	21	30	143	215	23	0.41	0.58	8.8	6.1	196	205	0.85	31	5.4
1082	Male	29	Married	Employed	33	31	227	141	25	0.49	0.49	10.4	6.9	224	196	0.67	39	6.3
1083	Male	22	Married	Merchant	10	15	262	134	30	0.35	0.43	8.4	5.5	120	58	1.15	56	5.6
1084	Male	24	Single	Merchant	11	21	148	147	74	0.37	0.52	8.5	5.8	124	58	1.04	25	3.9
1085	Male	24	Single	Employed	30	38	147	199	28	0.35	0.35	8.2	5.6	106	111	0.88	30	4.9
1086	Male	57	Married	Employed	14	19	156	298	12	0.35	0.46	7.1	4.4	147	93	1.1	32	3.9
1087	Female	28	Single	Merchant	9	12	153	122	18	0.06	0.15	8	5.3	180	79	0.57	17	3
1088	Female	19	Single	Student	8	16	158	252	11	0.34	0.36	8.6	5.3	96	48	0.77	21	3.2
1089	Female	24	Single	Merchant	11	18	153	200	15	0.41	0.51	8.2	5.4	139	95	0.77	24	4.4
1090	Female	30	Married	Merchant	16	19	169	133	31	0.22	0.28	9	6	218	54	0.9	21	4.7
1091	Male	22	Single	Merchant	9	17	178	136	14	0.49	0.77	8.1	4.6	64	108	0.92	29	3.1
1092	Male	54	Married	Merchant	22	27	202	159	42	0.28	0.3	8.2	5.1	206	177	0.91	21	4.8
1093	Male	35	Married	Employed	15	23	235	206	78	0.2	0.21	8.5	5.3	134	179	1.04	20	5.4
1094	Male	26	Single	Merchant	14	18	157	158	15	0.39	0.54	8.7	5.7	152	206	0.81	28	5
1095	Male	35	Married	Merchant	39	31	179	155	74	0.2	0.2	7.6	4.9	126	250	0.88	23	4.3
1096	Male	47	Married	Employed	10	12	156	175	28	0.19	0.2	8.6	5.4	178	103	1.13	28	5.8
1097	Female	22	Single	Merchant	15	20	116	63	12	0.29	0.39	7	4.5	126	59	0.88	15	2.9
1098	Female	20	Single	Merchant	23	24	251	243	15	0.19	0.22	10.3	6.4	188	88	0.62	27	4.2
1099	Female	38	Married	Merchant	8	26	130	137	15	0.23	0.34	8.5	5.5	170	98	0.82	27	3
1100	Female	20	Single	Merchant	11	17	137	115	16	0.25	0.29	7.8	5.2	129	78	0.89	35	5.5
1101	Male	42	Single	Merchant	25	34	124	123	62	0.2	0.33	8.7	5.5	150	80	1.04	31	6.7
1102	Male	27	Single	Daily laborer	11	23	53	197	10	0.13	0.13	8.5	5	118	48	0.83	24	4.1
1103	Female	35	Married	Employed	11	16	142	177	14	0.14	0.25	8.2	5.3	168	101	0.66	29	2.9
1104	Male	20	Single	Merchant	20	23	303	139	47	0.27	0.42	10.1	6.3	165	204	0.64	43	6.1
1105	Male	26	Single	Student	21	40	151	220	21	0.34	0.78	8.5	5.4	126	84	1.03	22	6.9
1106	Female	22	Single	Student	10	24	135	138	13	0.17	0.27	8.1	5.1	94	24	0.79	15	3.6
1107	Female	21	Single	Student	13	17	125	154	15	0.08	0.13	7.8	5.3	128	107	0.75	24	3.6
1108	Male	22	Single	Student	18	29	245	178	25	0.27	0.39	7.9	5.3	107	66	0.86	36	3.9
1109	Male	25	Single	Employed	15	34	208	152	22	0.28	0.71	8.9	5.5	151	49	1.03	24	4.1
1110	Male	23	Single	Student	26	32	165	281	24	0.39	0.63	7.8	4.8	147	104	0.78	16	4.2
1111	Female	21	Single	Student	13	27	121	98	11	0.5	0.69	7.9	5.3	124	60	0.74	11	2.6
1112	Female	21	Single	Student	10	31	175	241	10	0.24	0.28	7.8	5	149	41	0.8	28	3.2
1113	Female	21	Single	Student	22	30	191	168	14	0.16	0.3	8.4	5.6	180	131	0.71	29	2.4
1114	Male	28	Married	Merchant	28	36	133	186	29	0.27	0.33	8.2	5.4	165	198	1.04	27	5.5
1115	Male	23	Single	Student	27	23	143	180	87	0.14	0.17	7.4	4.8	142	142	0.99	20	4.4
1116	Female	21	Single	Student	15	41	154	195	16	0.19	0.24	7.2	4.7	162	93	0.68	17	2.6
1117	Female	24	Single	Student	9	31	191	152	17	0.2	0.25	7.1	4.8	146	57	0.77	30	3
1118	Female	25	Single	Student	7	19	158	126	14	0.42	0.49	7.8	5.2	100	56	0.83	20	3.9
1119	Female	24	Single	Student	13	29	176	184	23	0.21	0.24	7.6	5.1	132	52	0.83	22	2.8
1120	Female	20	Single	Student	12	27	92	193	11	0.27	0.36	7.7	5	165	93	0.97	30	3.3
1121	Female	24	Single	Student	10	28	160	164	12	0.2	0.26	8.1	5.2	135	39	0.8	23	2.8
1122	Female	24	Single	Student	12	27	119	106	18	0.3	0.36	8.6	5	91	51	0.8	20	3.6
1123	Female	27	Single	Student	12	27	107	261	11	0.29	0.42	8.1	5.6	163	132	0.64	17	2.9
1124	Female	19	Single	Student	8	27	128	136	12	0.22	0.26	8.2	4.9	124	75	0.85	25	3.7
1125	Female	20	Single	Student	12	27	180	136	16	0.17	0.24	7.7	5	123	139	0.81	25	5.1
1126	Female	20	Single	Student	17	22	146	169	12	0.48	0.63	7.7	5	110	104	1.01	25	4
1127	Female	23	Single	Student	11	12	143	136	8	0.34	0.43	7.7	5.4	107	84	0.92	35	4.6
1128	Female	22	Single	Student	17	20	207	295	11	0.14	0.14	7.8	5.1	111	105	0.74	38	3.2
1129	Female	23	Single	Student	48	36	330	173	74	0.2	0.33	8.9	5.8	184	191	0.21	11	6.5
1130	Female	22	Single	Student	12	21	127	196	16	0.19	0.29	8.5	5.6	138	62	0.72	28	3.8
1131	Female	18	Single	Student	6	13	170	131	9	0.11	0.14	8.7	5.3	132	112	0.55	22	3.2
1132	Male	40	Single	Merchant	19	26	203	141	15	0.12	0.12	9.3	6.1	147	187	0.71	28	5.3
1133	Female	19	Single	Student	10	15	124	205	8	0.14	0.14	7.6	4.9	107	112	1.18	44	4.4
1134	Male	18	Single	Student	17	28	356	171	30	0.11	0.4	8.9	5.5	113	77	0.67	34	4.7
1135	Male	20	Single	Student	15	30	223	225	12	0.29	0.46	9.8	5.6	106	172	0.61	28	4
1136	Female	20	Single	Student	10	12	223	206	14	0.11	0.17	8.5	5.5	196	73	0.89	26	3.8
1137	Female	20	Single	Student	13	19	235	196	17	0.05	0.12	8.6	6	151	143	0.72	20	3.2
1138	Male	25	Single	Student	15	20	163	271	32	0.04	0.18	8.7	5.6	140	119	0.89	37	6
1139	Male	20	Single	Student	15	20	274	108	13	0.23	0.27	9.3	5.6	163	236	0.48	18	4.9
1140	Male	18	Single	Student	18	27	389	214	48	0.07	0.2	8.8	6	117	118	0.82	26	4.7
1141	Female	18	Single	Student	10	19	158	103	12	0.05	0.12	8	5.3	138	70	0.79	20	3.5
1142	Female	18	Single	Student	22	22	196	141	16	0.1	0.13	8.7	5.6	160	220	0.48	28	3.1
1143	Female	18	Single	Student	9	24	170	172	29	0.11	0.46	8.5	5.5	130	76	0.83	34	5
1144	Female	18	Single	Student	12	23	233	141	10	0.17	0.26	7.8	5.1	162	82	0.78	17	4.4
1145	Female	18	Single	Student	9	21	344	199	19	0.09	0.22	8.9	6.1	100	35	0.81	16	4.1
1146	Male	19	Single	Student	14	19	285	216	15	0.19	0.28	8.3	5.7	137	134	0.83	37	5
1147	Female	19	Single	Student	9	19	143	190	11	0.07	0.07	7.9	5.1	116	101	0.72	30	3.6
1148	Female	19	Single	Student	18	41	251	147	15	0.09	0.2	8.2	5.2	116	122	0.94	20	4.5
1149	Female	22	Single	Student	13	17	224	147	20	0.39	0.64	7.9	5.5	118	106	0.91	25	3.8
1150	Female	20	Single	Student	16	24	282	156	30	0.1	0.2	8.3	5.4	131	68	0.88	27	4.7
1151	Male	20	Single	Student	15	25	196	317	59	0.12	0.2	9.2	5.8	149	115	0.92	26	3.8
1152	Female	23	Single	Student	19	23	146	211	25	0.22	0.3	7.9	5.1	184	71	1.03	31	4.5
1153	Male	25	Single	Student	15	22	289	208	13	0.1	0.18	8.7	5.5	93	46	1.07	24	3.8
1154	Male	19	Single	Student	9	19	143	190	11	0.12	0.12	7.9	5.1	116	101	0.72	30	3.6
1155	Male	20	Single	Student	18	18	201	162	22	0.16	0.18	7.9	4.6	95	57	0.38	25	3.4
1156	Male	18	Single	Student	13	19	392	241	16	0.19	0.33	8.6	5.7	136	110	0.69	28	3.2
1157	Female	24	Single	Student	10	21	156	322	12	0.12	0.18	8.4	5.5	147	72	0.85	24	2.5
1158	Female	19	Single	Student	24	27	197	182	24	0.12	0.17	7.5	4.7	175	164	0.56	14	3.7
1159	Female	21	Single	Student	12	16	137	143	9	0.14	0.23	7.4	5	229	218	0.61	22	2
1160	Male	20	Single	Student	11	19	132	196	16	0.16	0.22	8.4	5.3	136	187	0.69	18	2.6
1161	Male	23	Single	Student	12	16	189	184	13	0.25	0.32	8.7	5.8	121	106	0.59	27	3.7
1162	Male	20	Single	Student	34	27	40	87	20	0.07	0.09	6.8	5.5	67	64	1.44	30	2.5
1163	Male	23	Single	Student	25	30	179	137	32	0.17	0.2	9.4	6.4	164	212	0.88	29	7
1164	Male	23	Single	Student	18	29	308	151	23	0.17	0.17	9.6	5.9	128	69	0.63	23	3.2
1165	Female	18	Single	Student	18	18	230	129	21	0.06	0.24	7.8	5.4	109	66	0.8	34	5.1
1166	Female	21	Single	Student	10	18	228	212	18	0.17	0.25	8	5.1	120	105	0.47	19	3.4
1167	Female	21	Single	Student	10	15	84	117	15	0.11	0.18	7.6	4.7	137	77	0.88	26	3
1168	Male	20	Single	Student	19	23	138	261	33	0.17	0.35	9.3	6.3	151	90	1.03	22	5.1
1169	Male	18	Single	Student	23	32	144	234	21	0.07	0.17	8.3	5.2	128	80	0.84	27	4.4
1170	Female	20	Single	Student	8	21	177	216	10	0.03	0.18	7.9	5.1	147	81	0.46	23	3.3
1171	Male	32	Married	Merchant	45	51	131	191	58	0.55	0.76	9.1	5.9	242	252	0.98	40	8
1172	Female	30	Married	Employed	9	24	118	176	9	0.17	0.27	7.2	4.7	131	63	0.95	21	2.1
1173	Male	27	Single	Student	27	46	232	151	20	0.13	0.43	9.5	6.4	150	93	0.79	28	4.7
1174	Female	25	Married	Merchant	13	23	142	137	10	0.13	0.15	7.7	5.3	131	100	0.8	27	4.5
1175	Female	25	Single	Employed	8	14	161	207	12	0.34	0.44	8.4	5.3	156	86	0.79	10	3.5
